# Supplementary material for: Primary aminomethyl derivatives of kaempferol: hydrogen bond-assisted synthesis, anticancer activity and spectral properties
Source: Royal Society of Chemistry journal article supplement (doi:10.1039/c7ob02927f), 2018-01-01
Supplement: c7ob02927f1.pdf [file c7ob02927f1.pdf]

## Supporting Information

### Primary Aminomethyl Derivatives of Kaempferol: hydrogen-bond assisted synthesis, anticancer activity and spectral properties

Shuanglian Cai,<sup>†a</sup> Yangyang Kong,<sup>†a</sup> Dan Xiao,<sup>†a</sup> Yun Chen,<sup>a\*</sup> and Qian Wang<sup>a\*</sup>

<sup>a</sup>State Key Laboratory of Chemo/Biosensing and Chemometrics, College of Chemistry and Chemical Engineering, Hunan University, Changsha, Hunan 410082, China

\*To whom correspondence should be addressed:

Tel: +86-731-88821449; Fax: +86-731-88713642;

E-mail: ychen@hnu.edu.cn(Y.Chen); wangqa@hnu.edu.cn (Q. Wang)

#### Content

|                                                                            |       |
|----------------------------------------------------------------------------|-------|
| Figure S1-S2.....                                                          | 2-3   |
| IR, NMR and MS of compounds.....                                           | 3-22  |
| Table S1-S6.....                                                           | 23-33 |
| Determination of stoichiometry and the stability constant of complex ..... | 34    |

Figure S1-S5

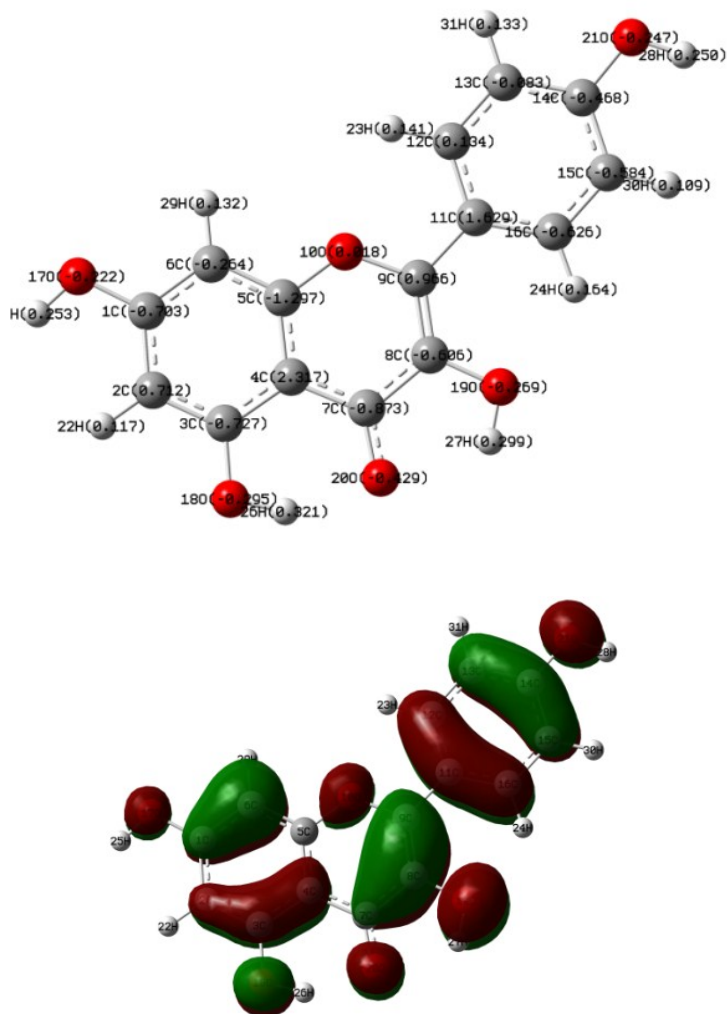

Figure S1. Computing result showing the Mulliken charge distribution (upper) and HOMO (down) for kaempferol based on B3LYP/6-311+G(d,p) level using Gaussian 09 package.

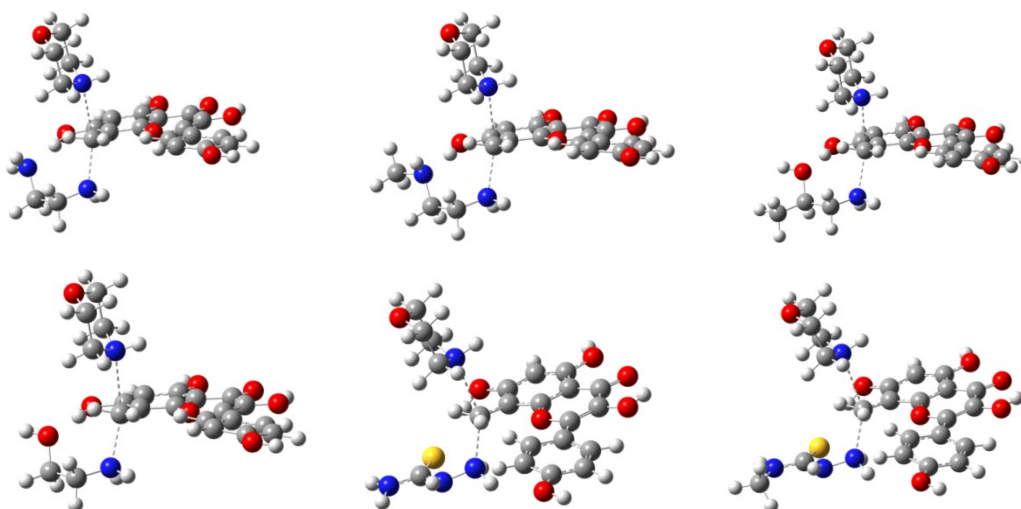

Figure S2. The optimized structures of the amine exchange transition states for morpholine...kaempferol...amines.

IR, NMR and MS of compounds 5a-h

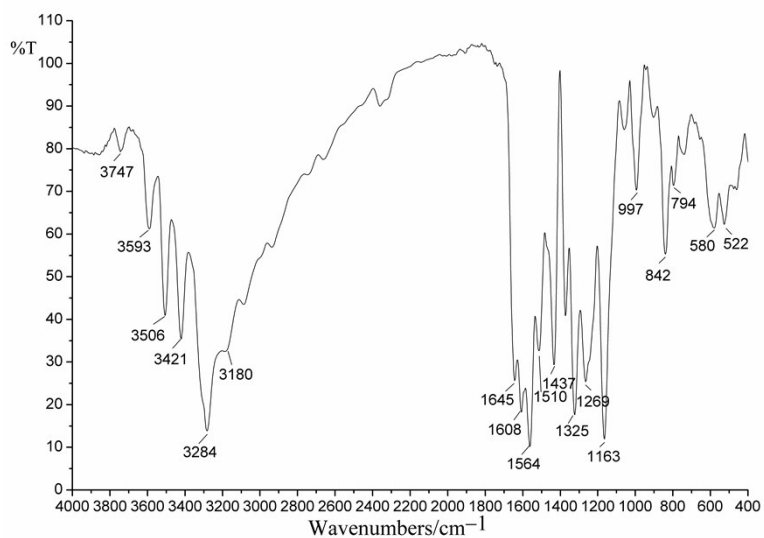

IR of 5a

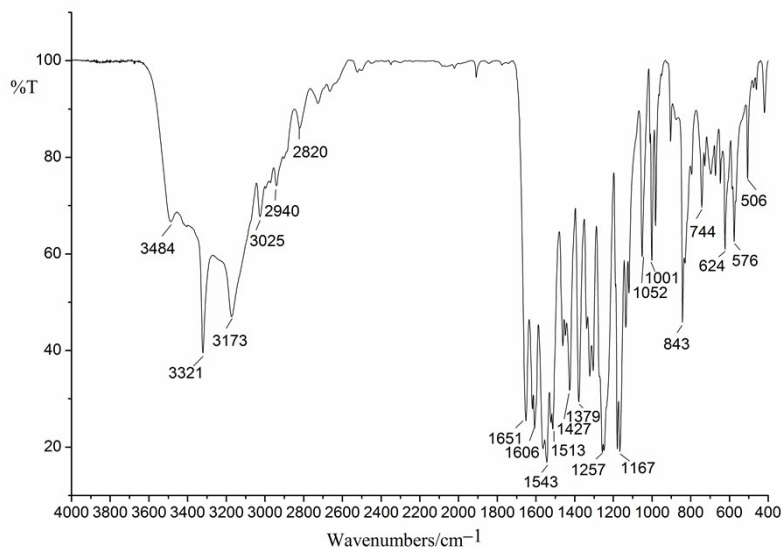

IR of 5b

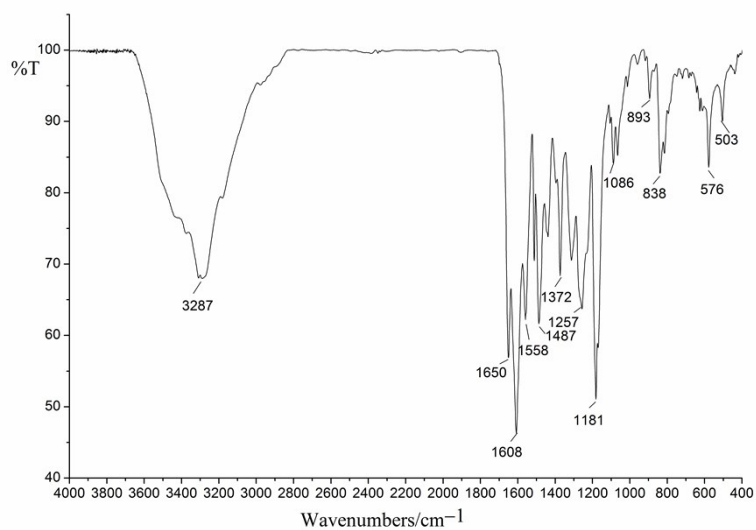

IR of 5c

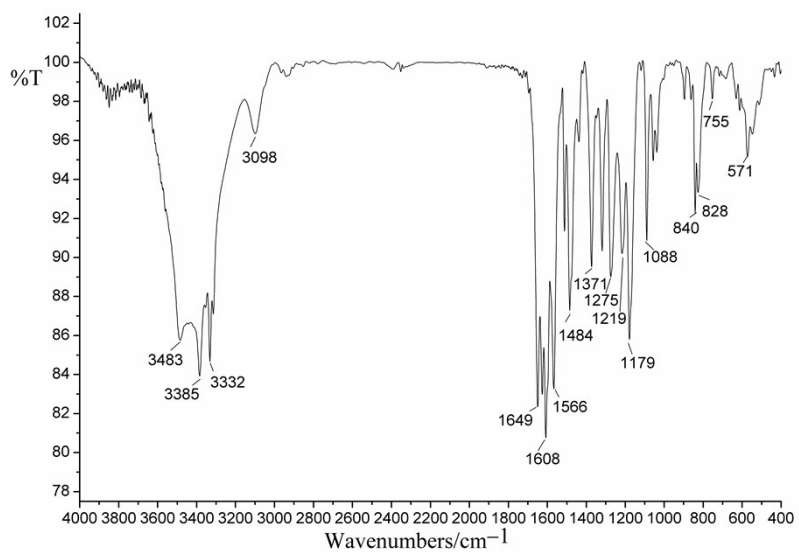

IR of 5d

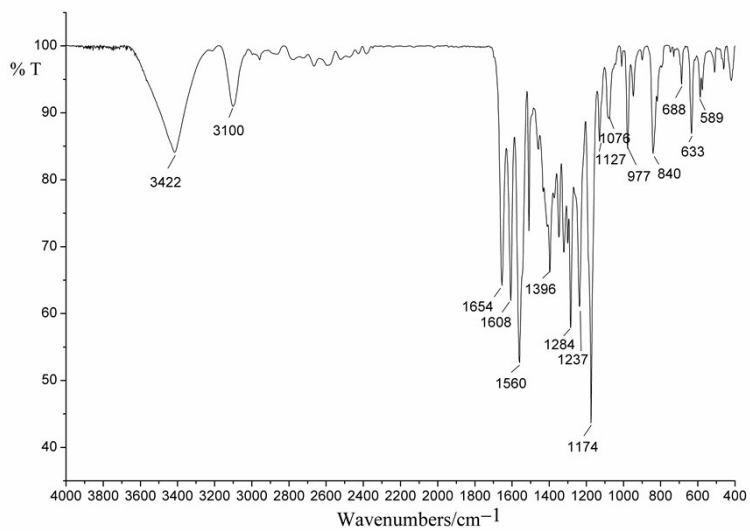

IR of 5e

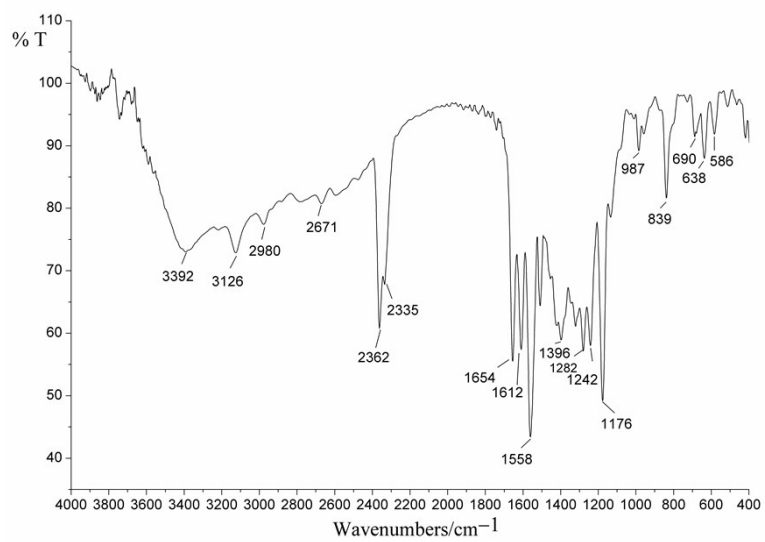

### IR of 5f

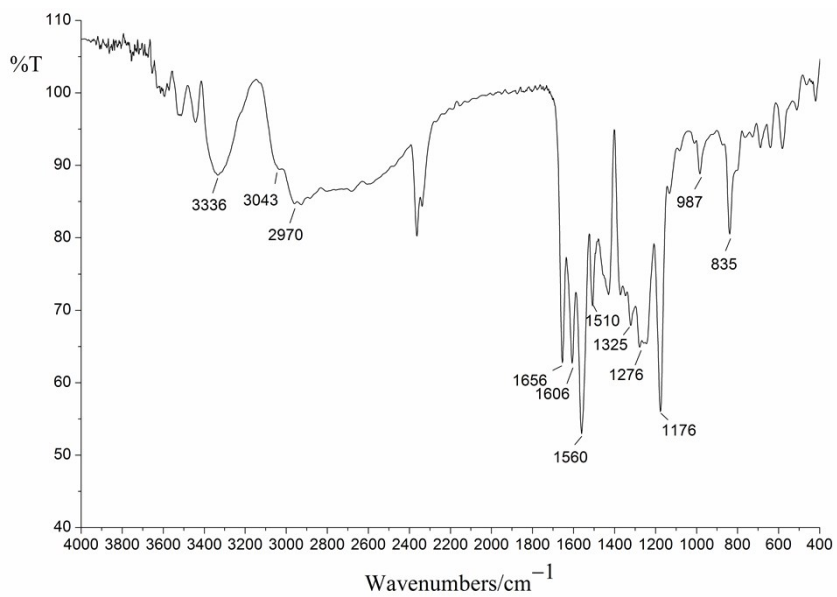

### IR of 5h

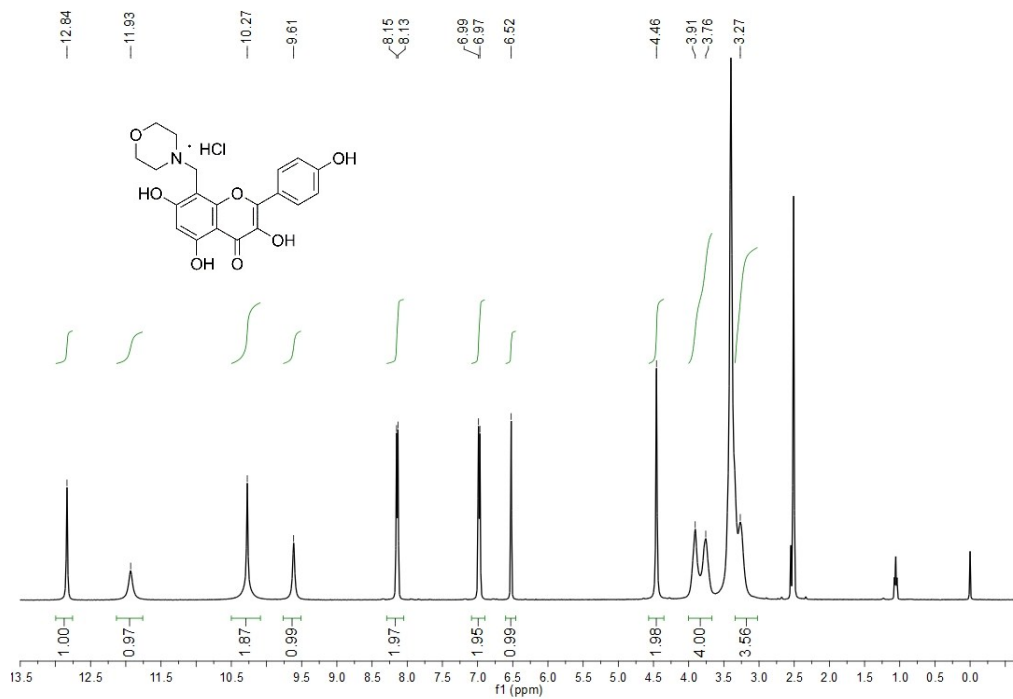

### <sup>1</sup>H NMR of 4a

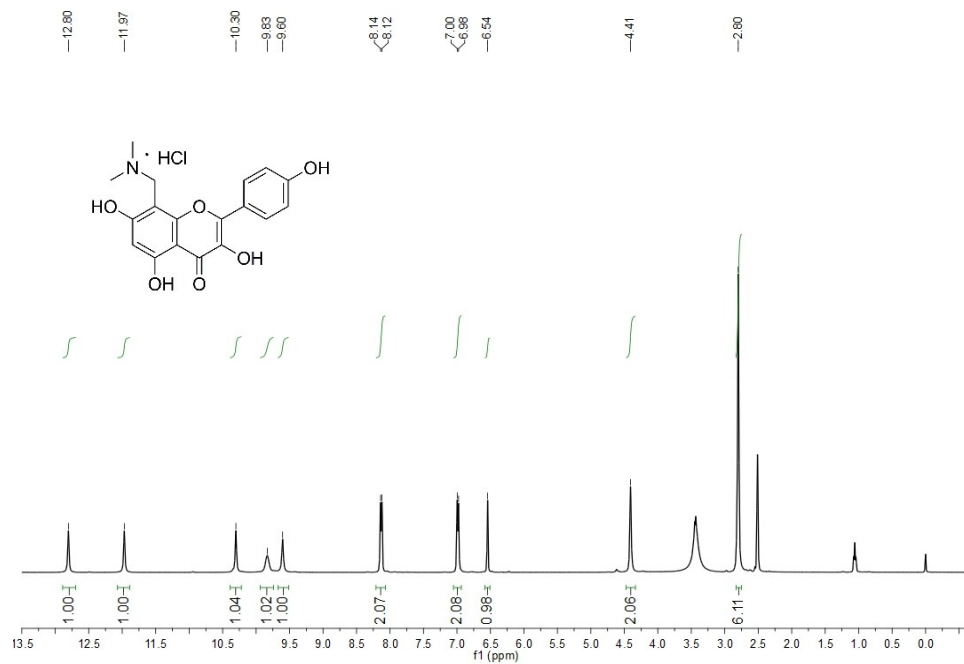

H NMR of 4b

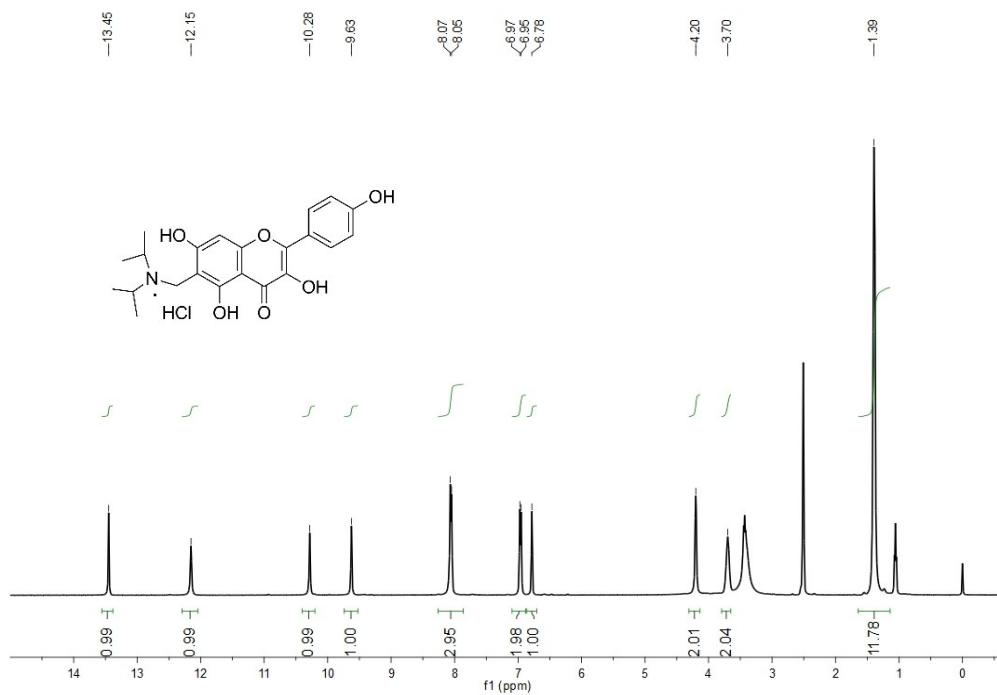

H NMR of 4c

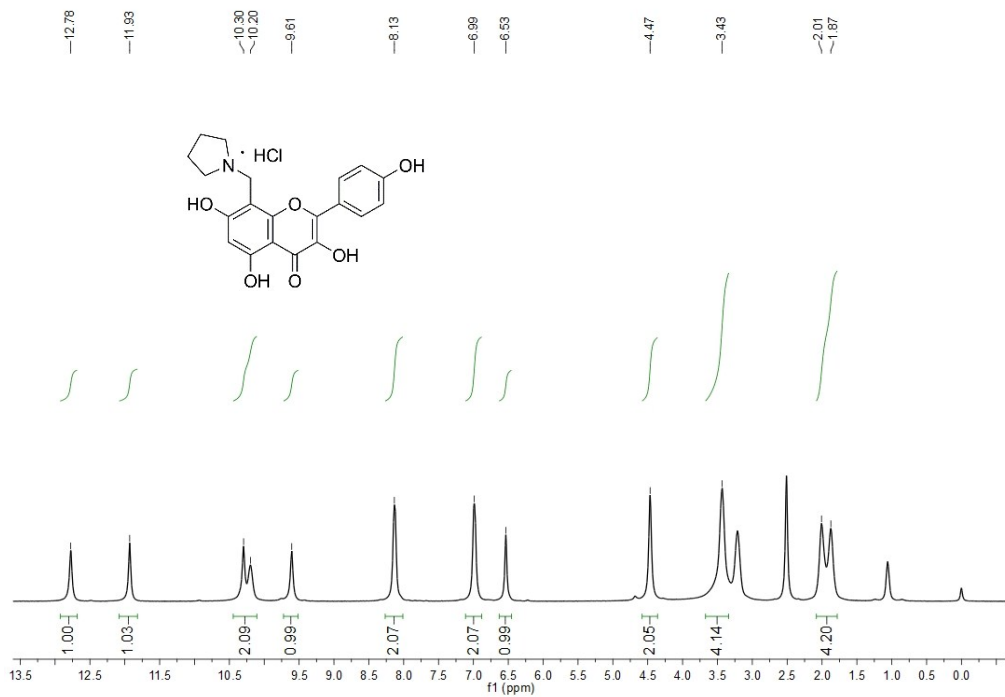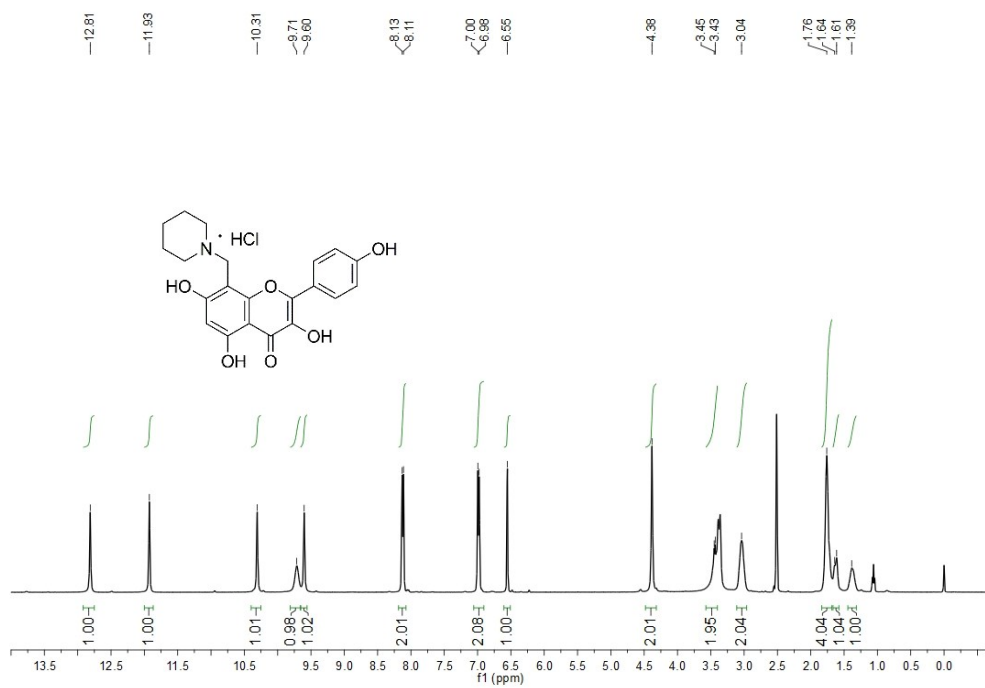

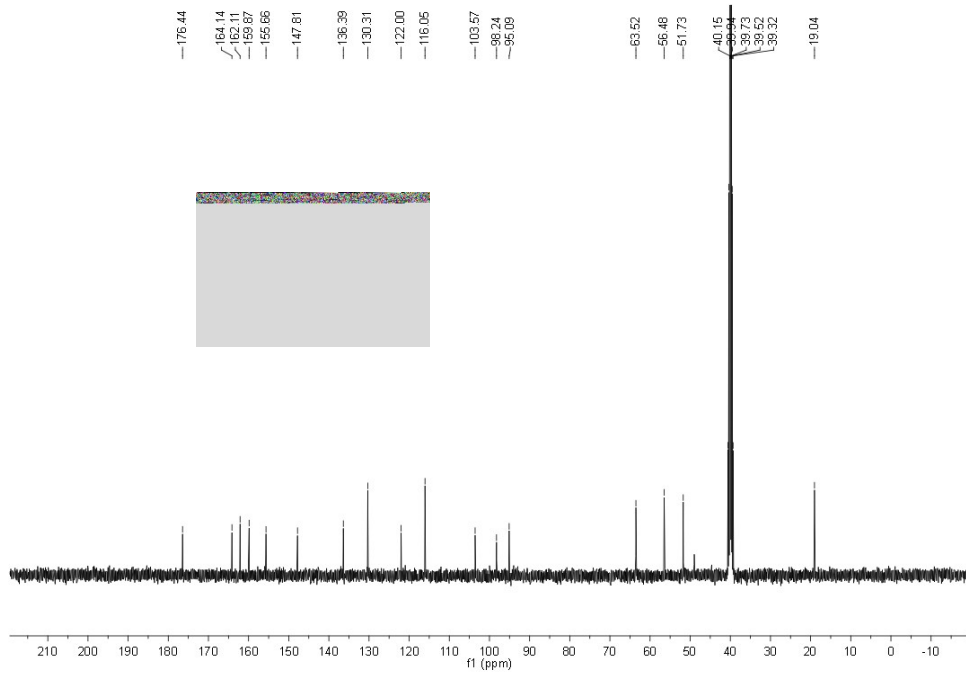

C NMR of 4a

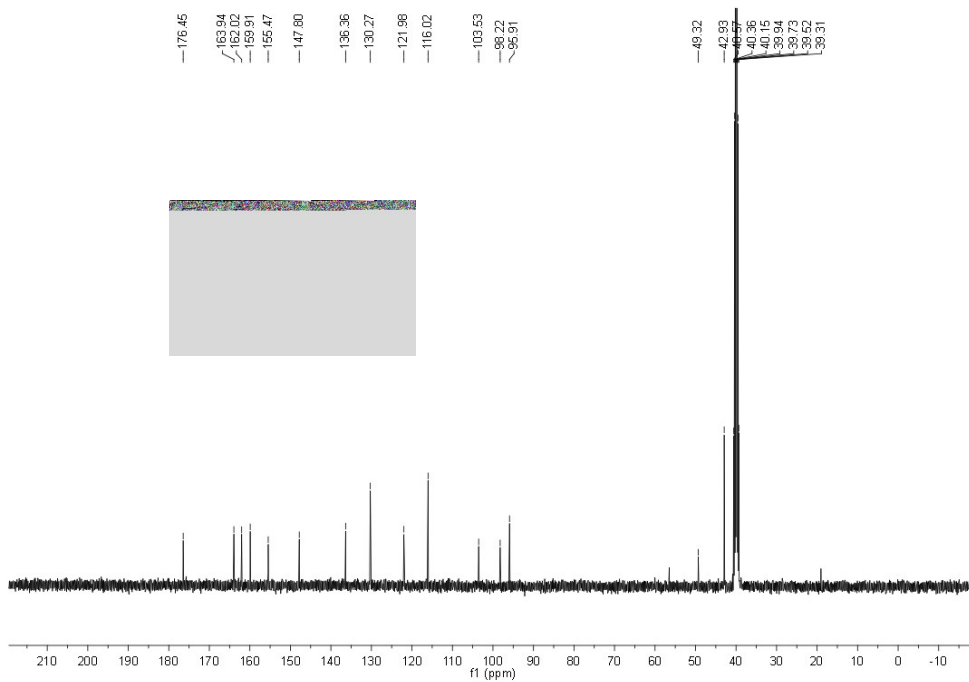

C NMR of 4b



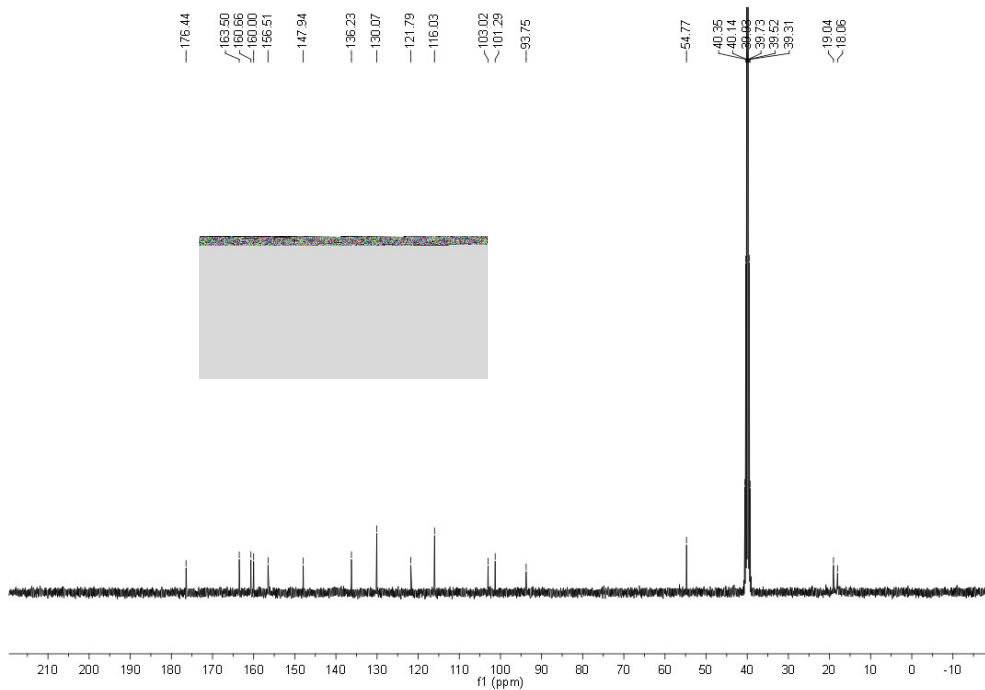

C NMR of 4c

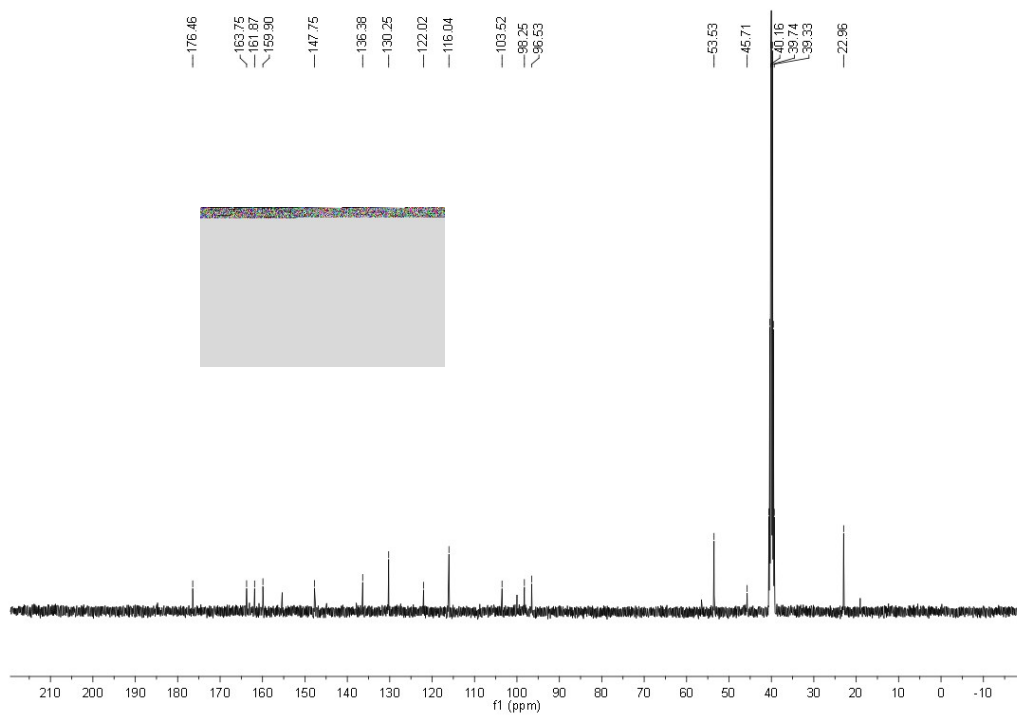

C NMR of 4d

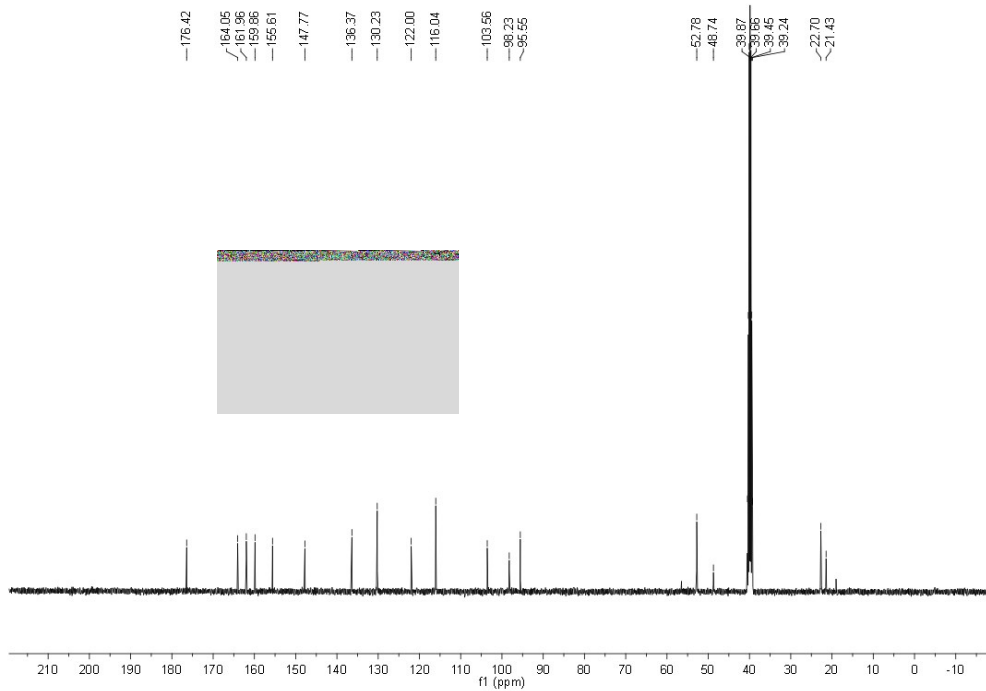

**<sup>13</sup>C NMR of 4e**

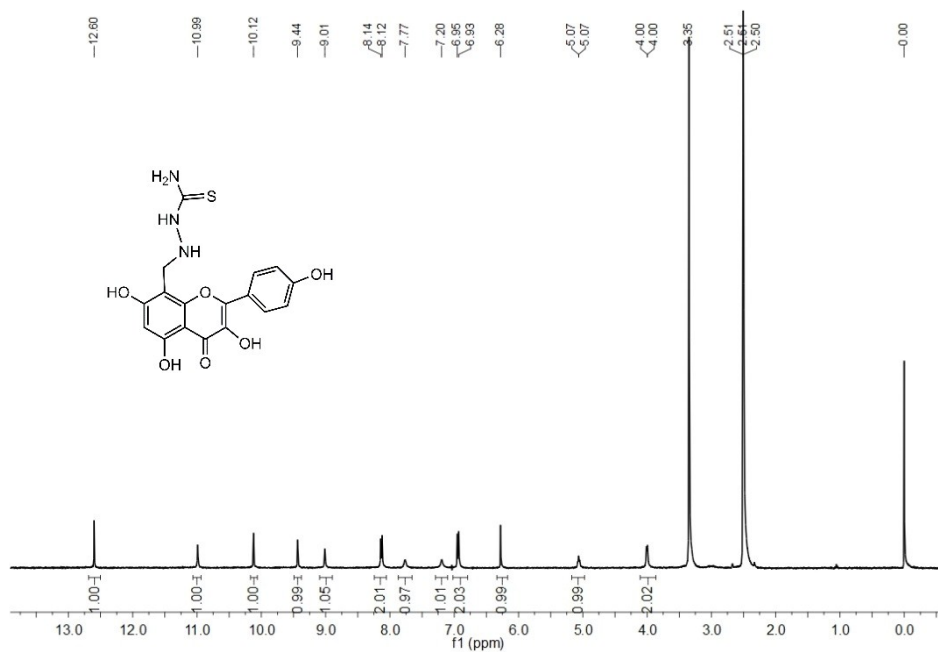

**<sup>1</sup>H NMR of 5a**

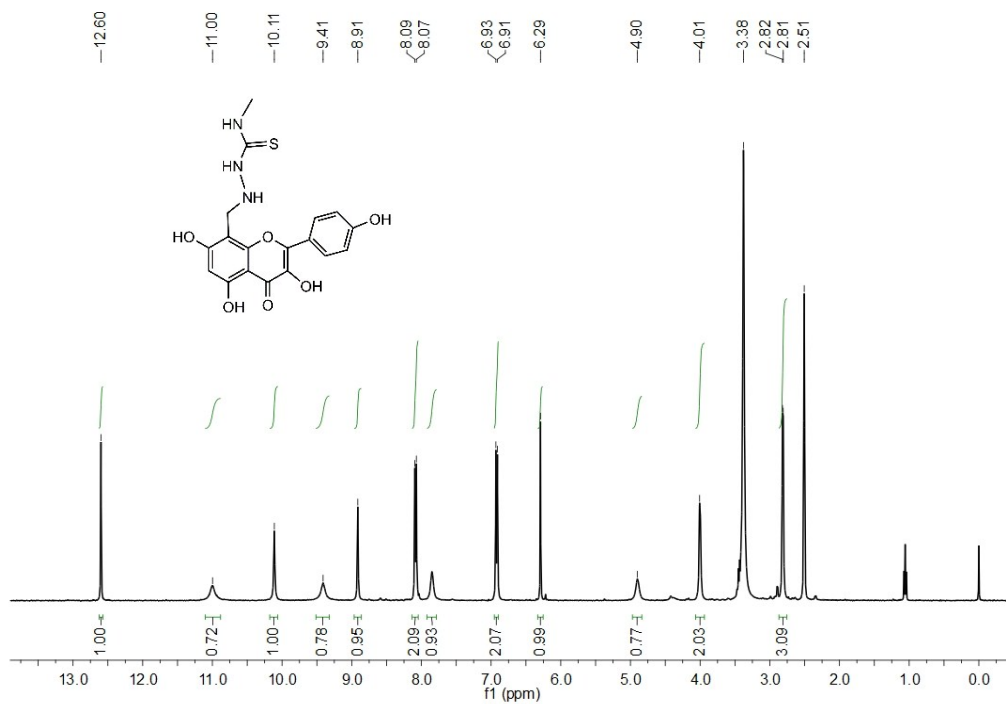

<sup>1</sup>H NMR of 5b

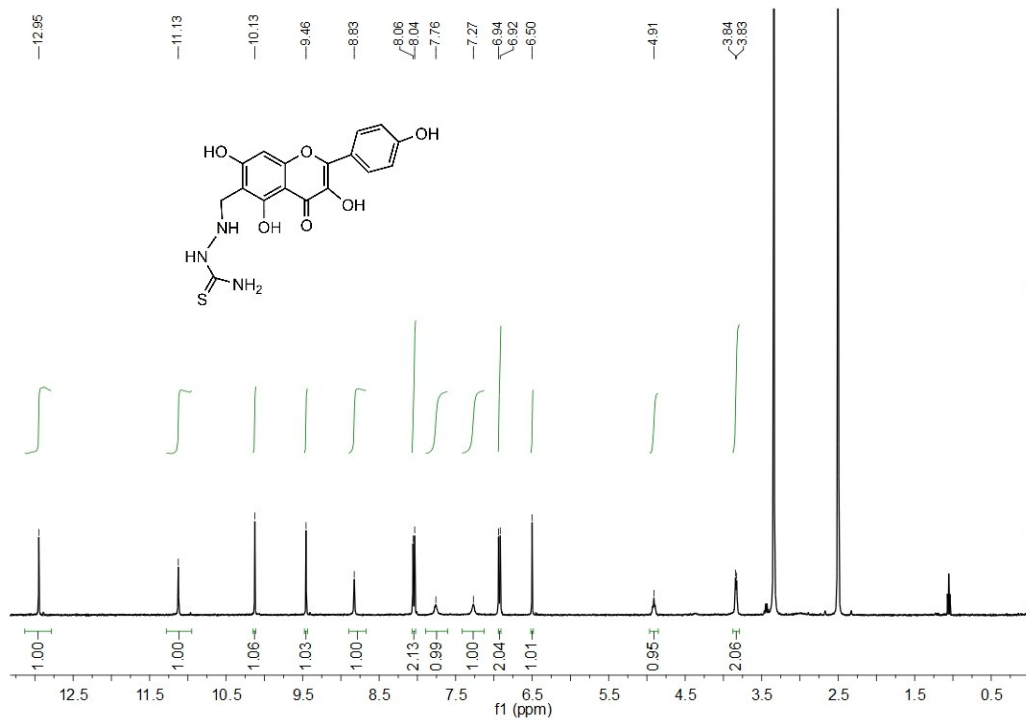

<sup>1</sup>H NMR of 5c

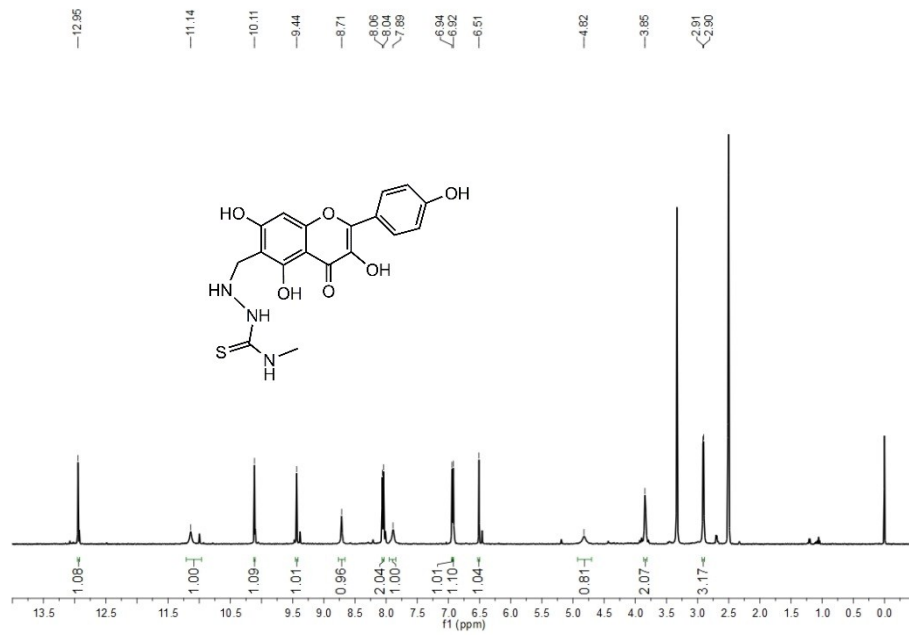

<sup>1</sup>H NMR of 5d

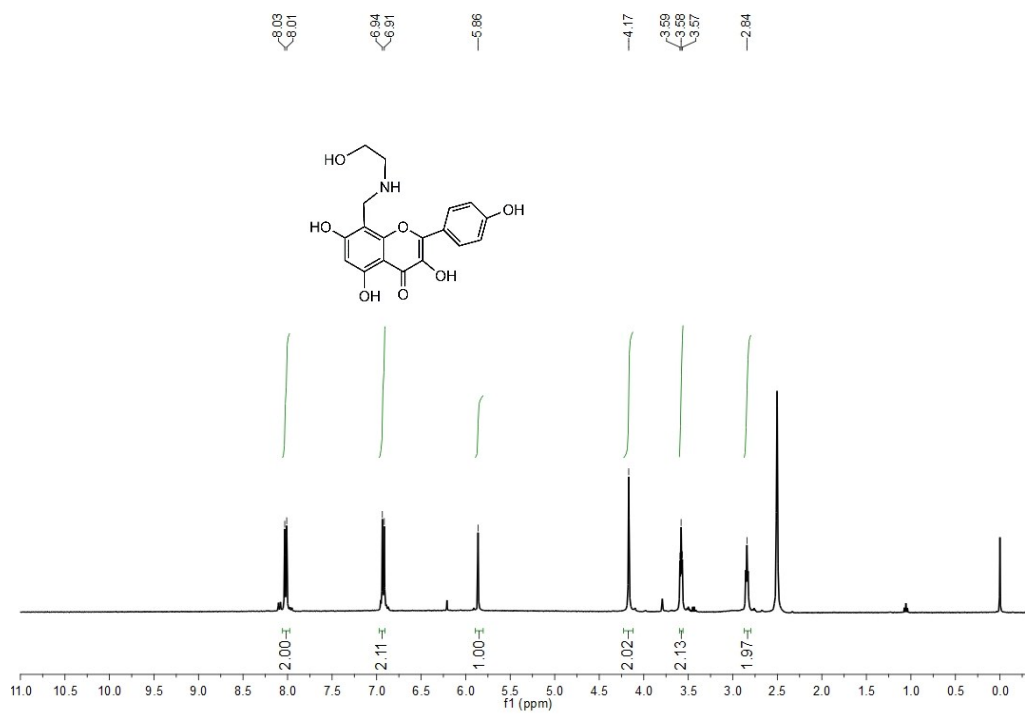

<sup>1</sup>H NMR of 5e

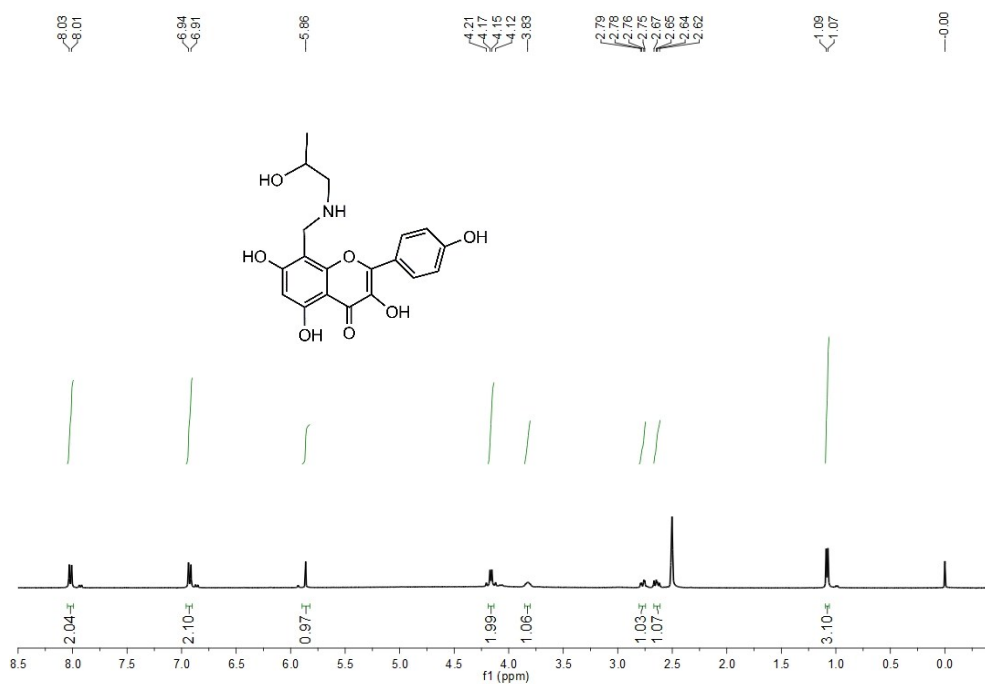

<sup>1</sup>H NMR of 5f

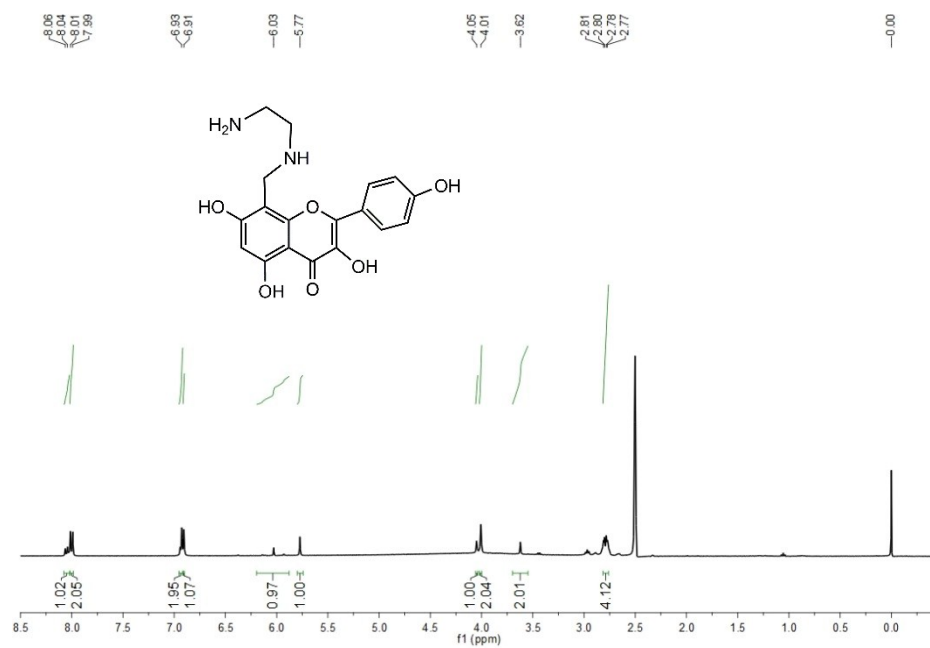

<sup>1</sup>H NMR of 5g

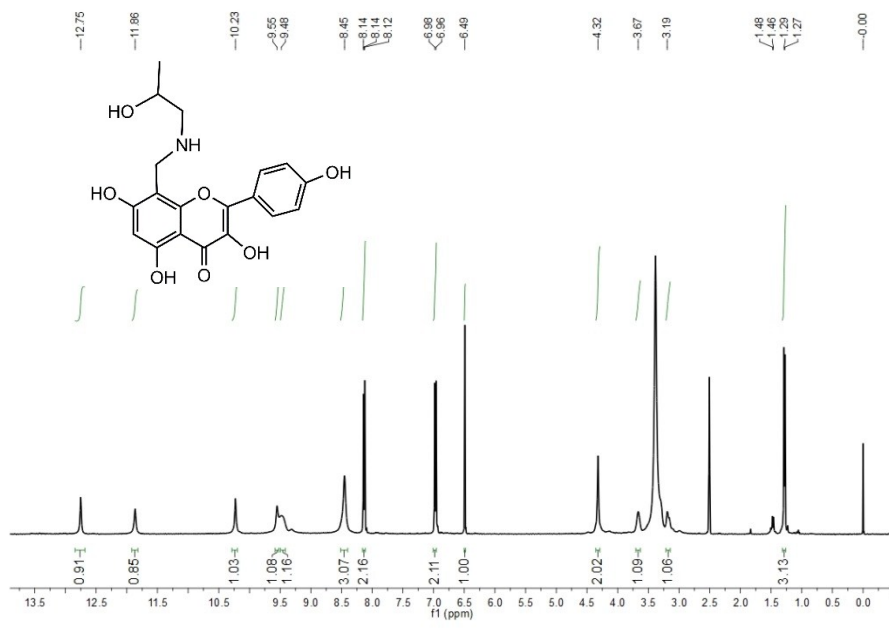

<sup>1</sup>H NMR of 5h

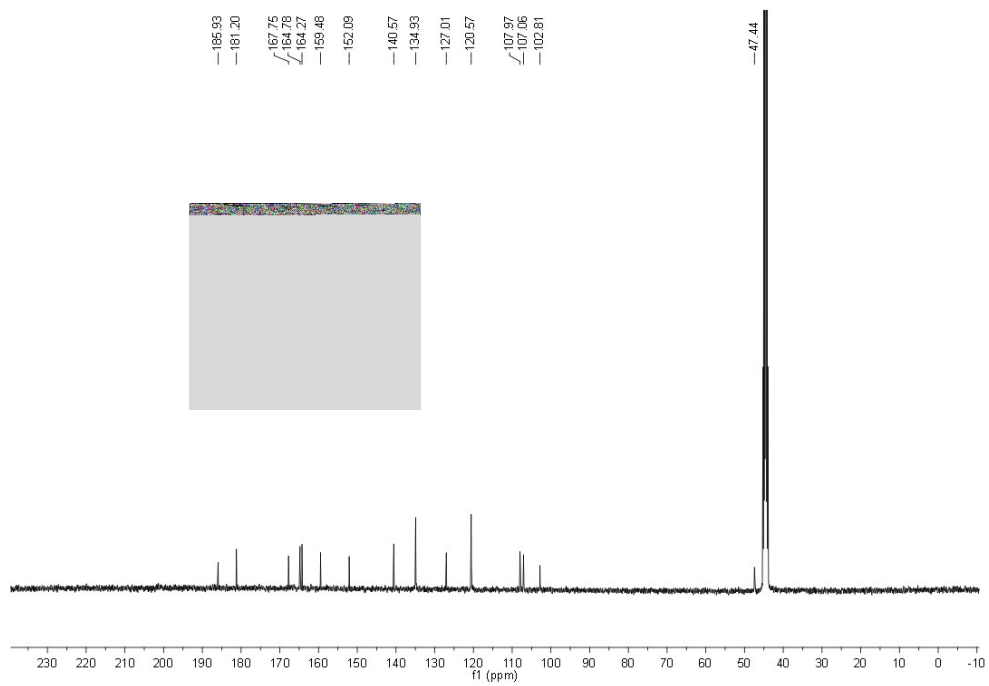

<sup>13</sup>C NMR of 5a

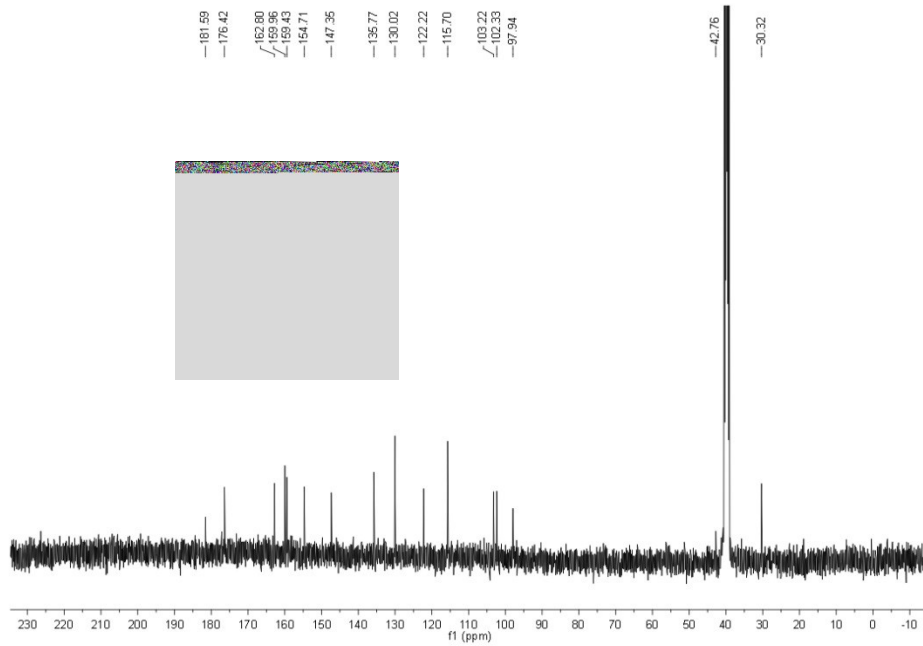

**<sup>13</sup>C NMR of 5b**

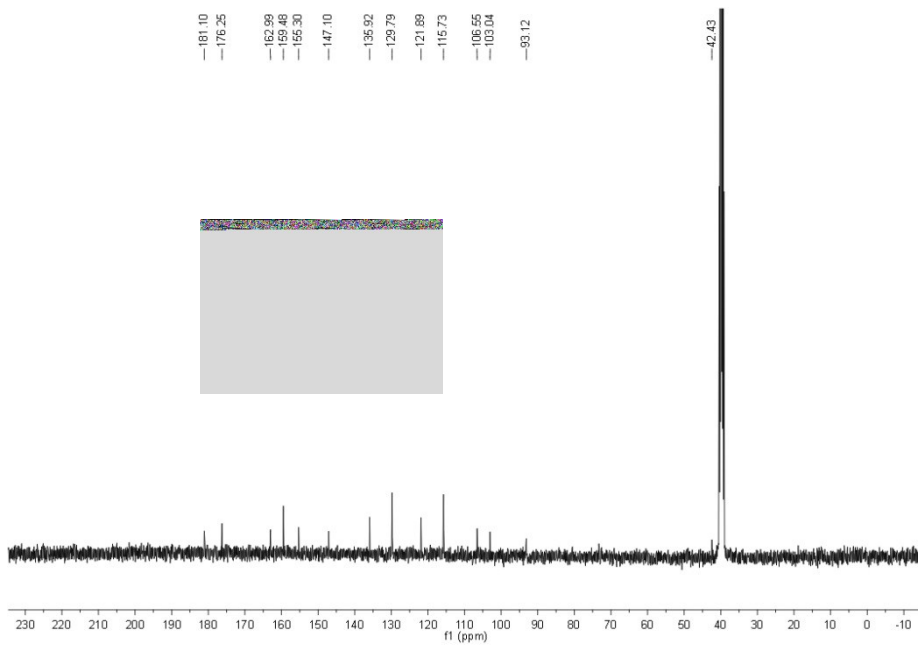

**<sup>13</sup>C NMR of 5c**

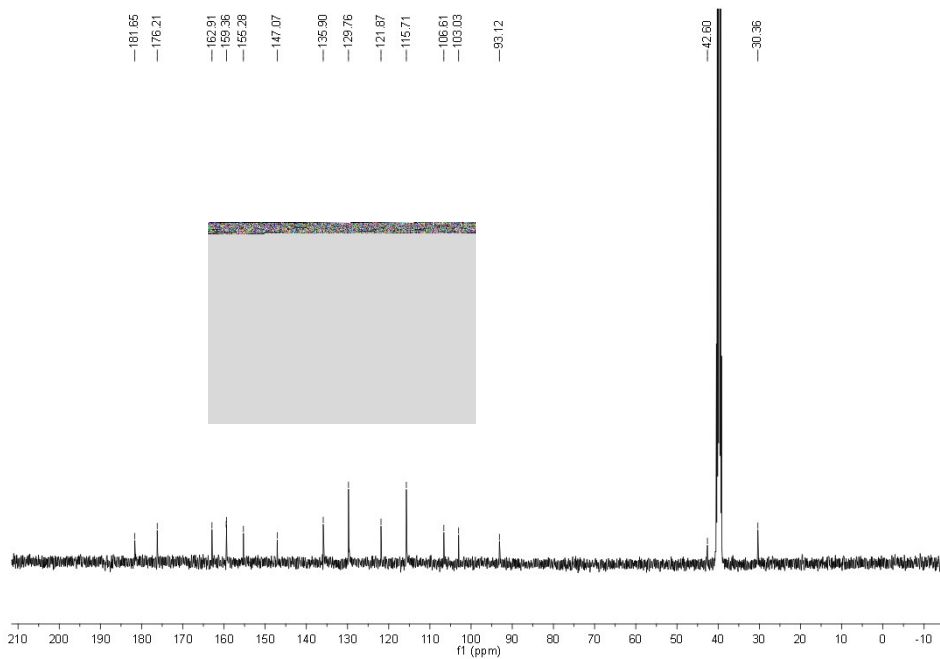

<sup>13</sup>C NMR of 5d

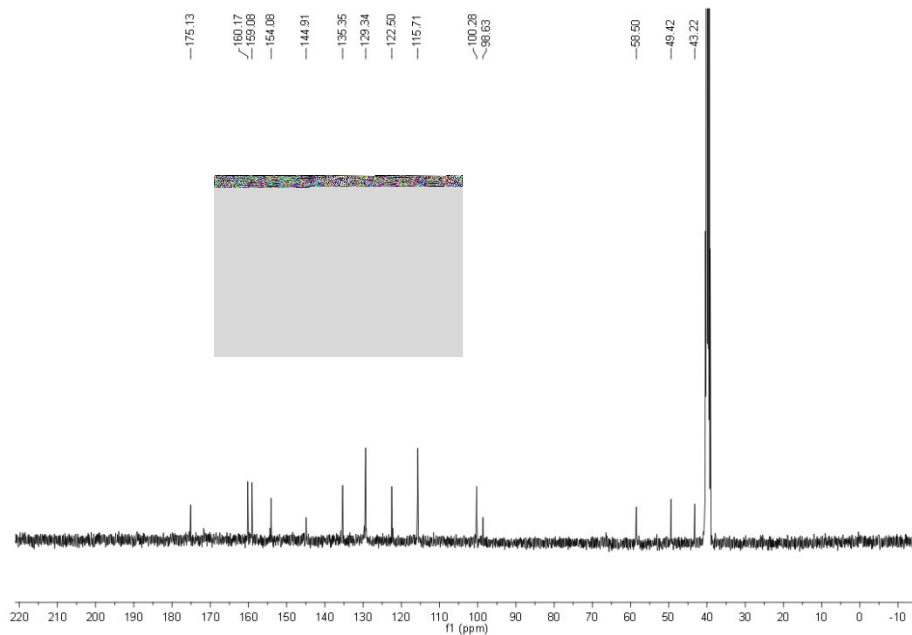

<sup>13</sup>C NMR of 5e



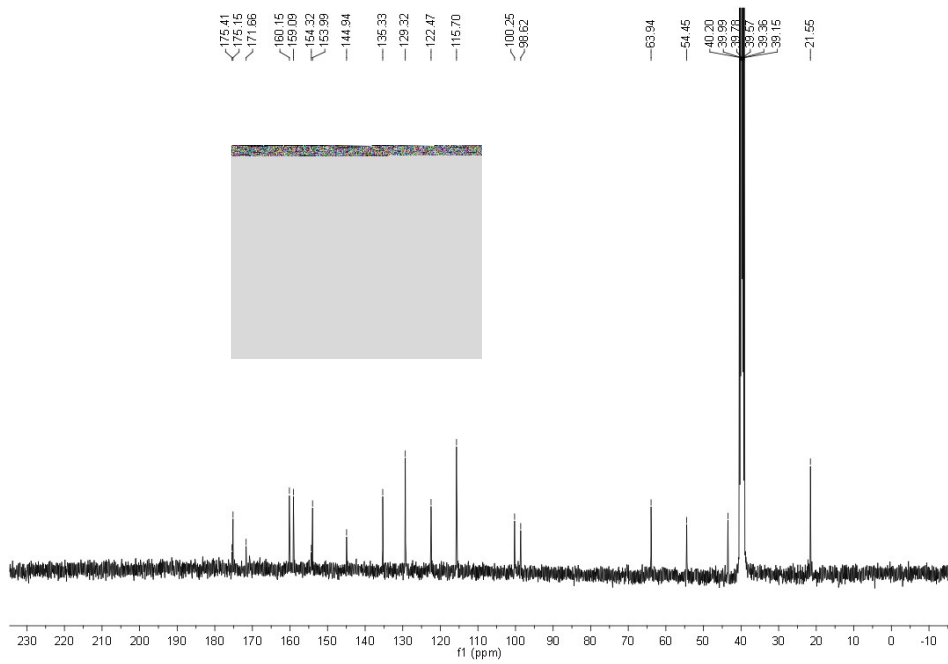

<sup>13</sup>C NMR of 5f

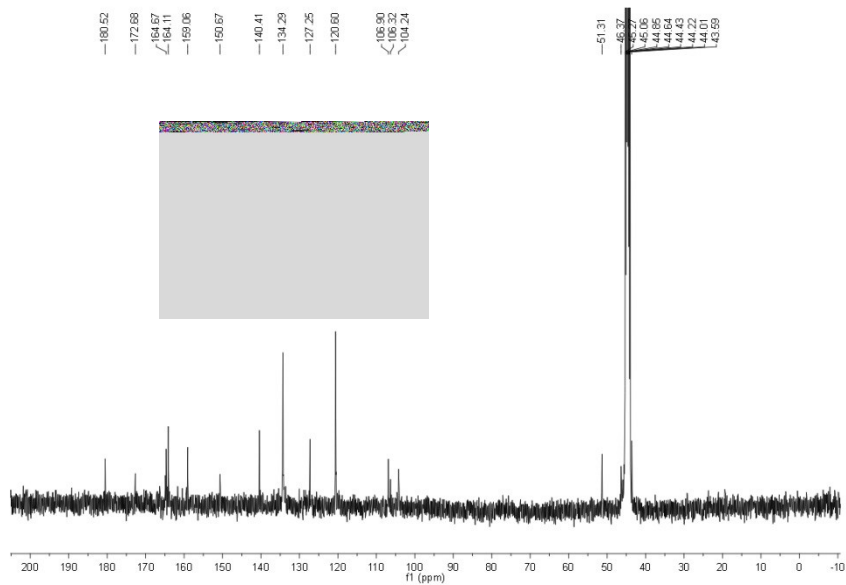

<sup>13</sup>C NMR of 5g

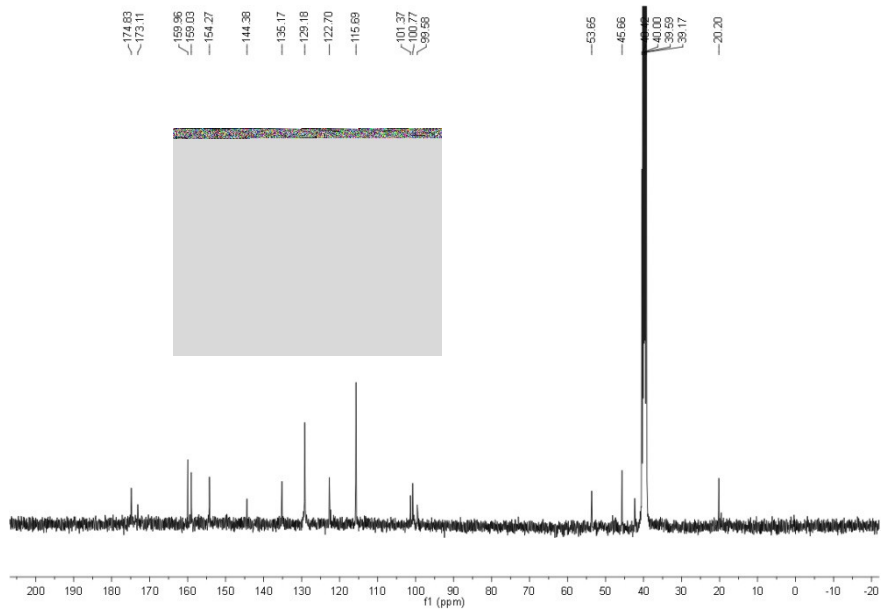

<sup>13</sup>C NMR of 5h

xd-140408-389 #3 RT: 0.06 AV: 1 NL: 1.49E6  
T: - c ESI ms [ 50.00-2000.00]

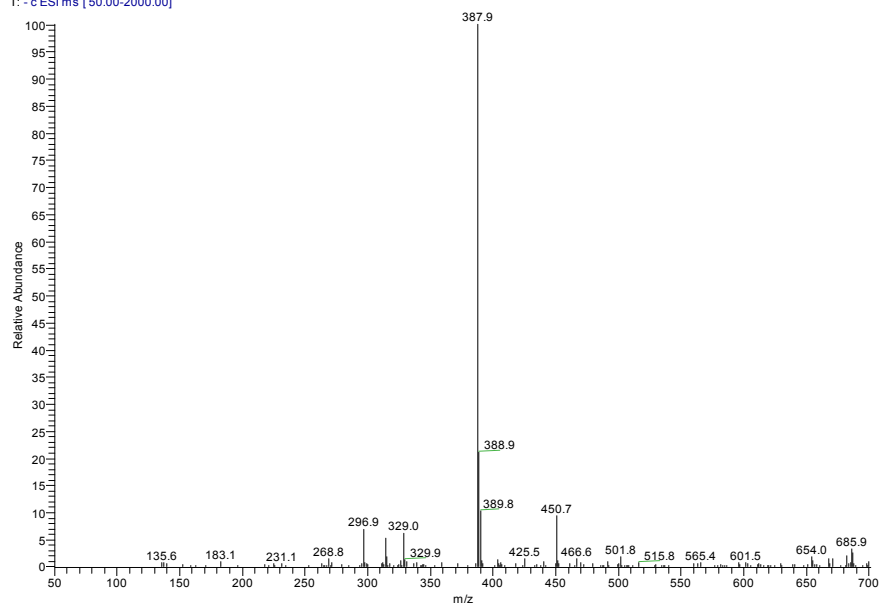

MS of 5a

xd-140429-403 #18 RT: 0.66 AV: 1 SB: 4 0.06-0.14 NL: 4.10E6  
T: - c ESI ms [50.00-2000.00]

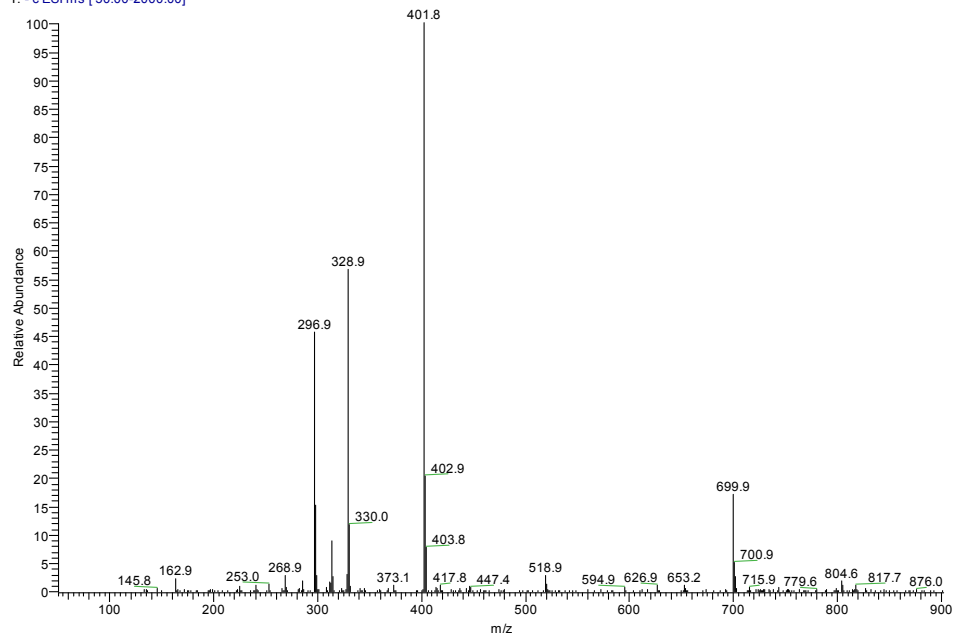

MS of 5b

xd-140917-389 #21 RT: 0.41 AV: 1 SB: 3 0.19-0.22 NL: 3.01E6  
T: - c ESI ms [50.00-1200.00]

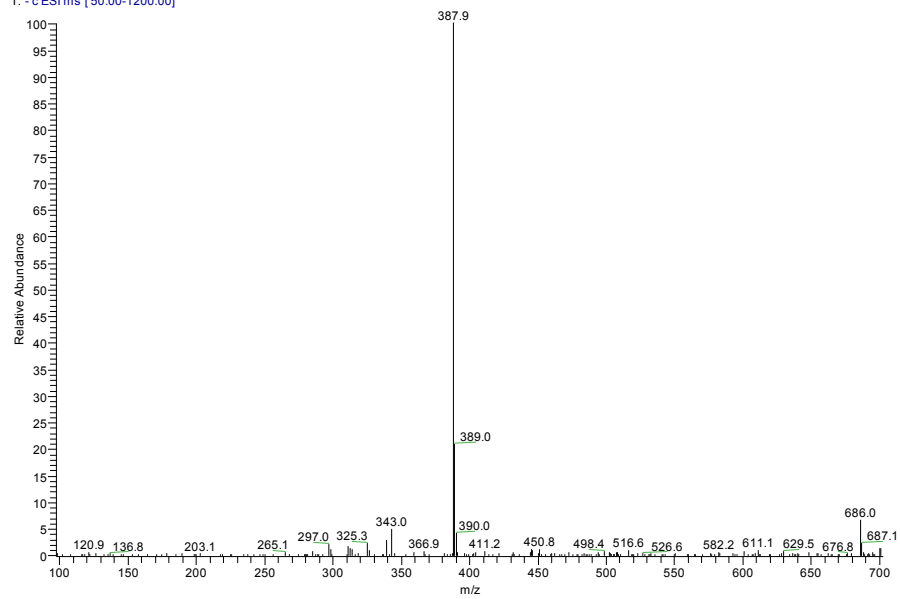

MS of 5c

xd-140917-403 #25 RT: 0.40 AV: 1 SB: 3 0.19-0.22 NL: 1.94E6  
T: - c ESI ms [50.00-800.00]

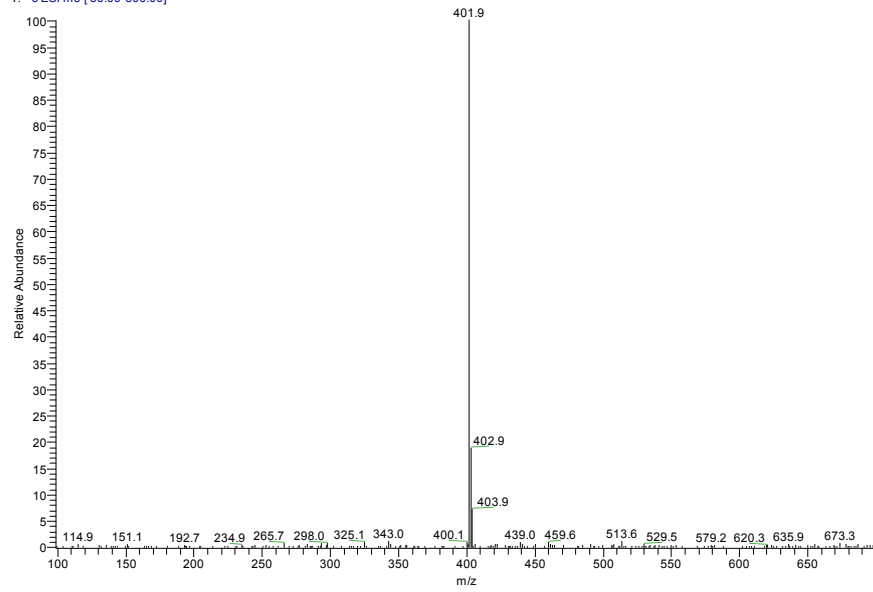

MS of 5d

xd-140912-359 #27 RT: 0.42 AV: 1 SB: 6 0.15-0.23 NL: 1.04E6  
T: - c ESI Full ms [50.00-800.00]

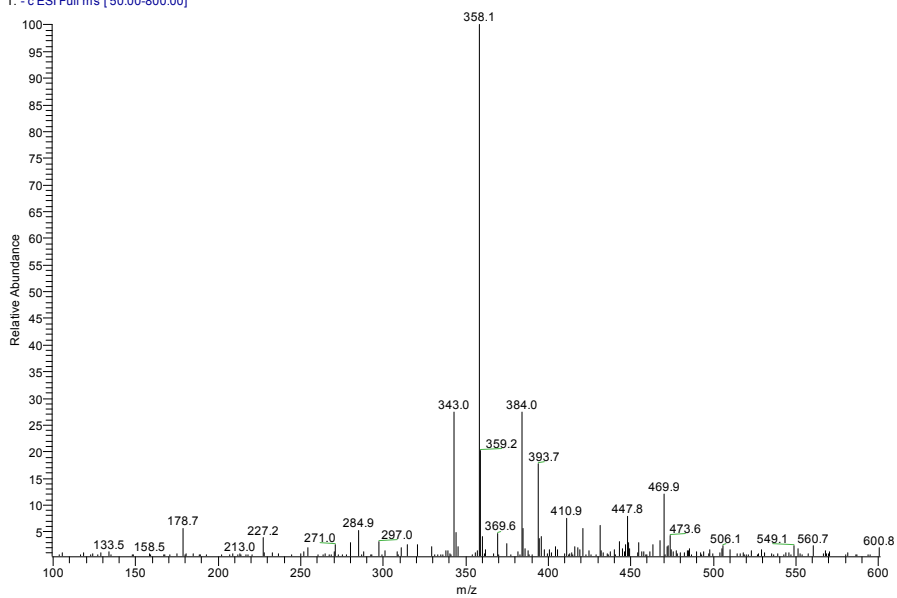

MS of 5e

xl-140912-373 #39 RT: 0.64 AV: 1 SB: 5 0.02-0.08 NL: 1.91E7  
T: + c ESI ms [50.00-800.00]

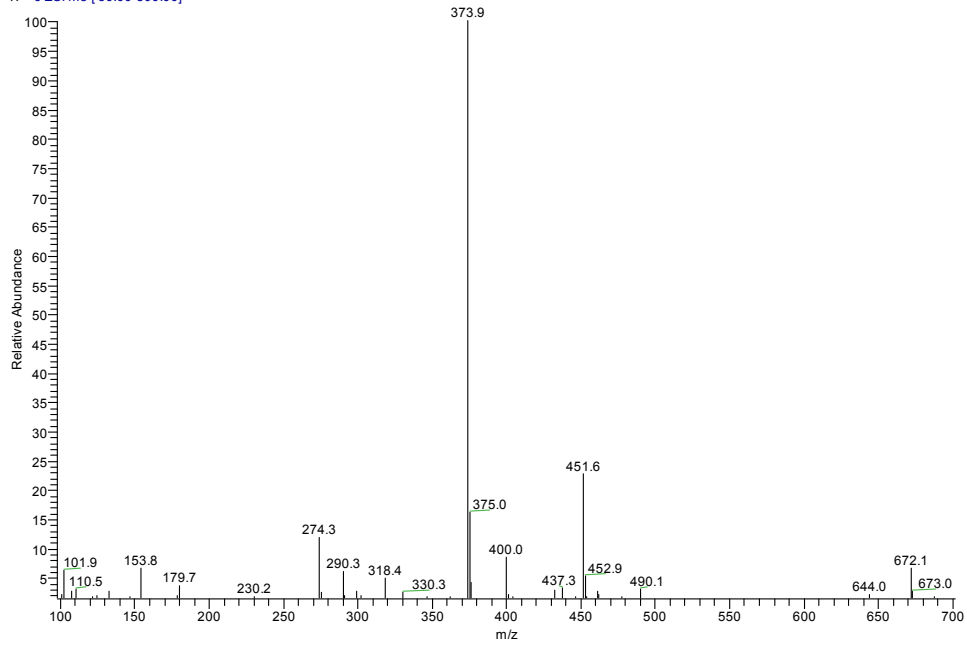

MS of 5f

xl-140917-358-2 #33 RT: 0.51 AV: 1 SB: 6 0.04-0.12 NL: 7.14E5  
T: - c ESI Full ms [50.00-800.00]

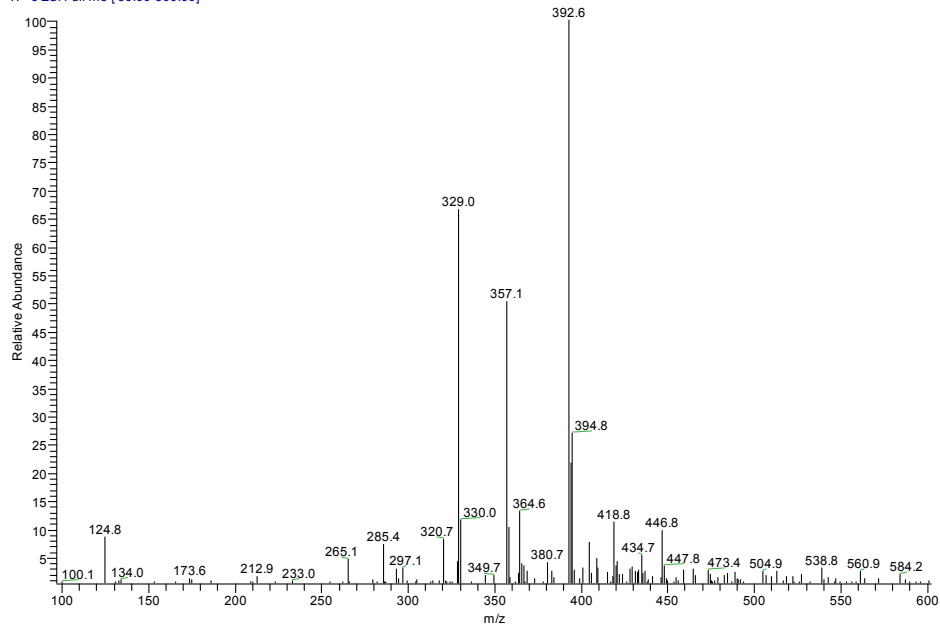

MS of 5g

xd-140921-372 #29 RT: 0.55 AV: 1 SB: 6 0.04-0.13 NL: 3.26E6  
T: + c ESI Full ms [50.00-1000.00]

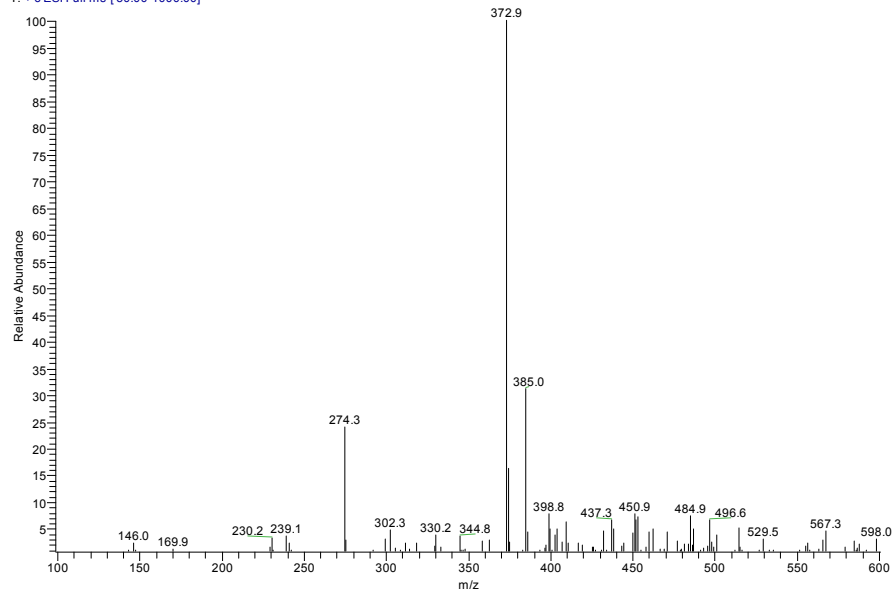

MS of 5h

Table S1-S6

Table S1. Standard Orientation of the Transition State [morpholine...kaempferol...ethylenediamine]

| Tag | Symbol | Coordinates (Angstroms) |            |            |
|-----|--------|-------------------------|------------|------------|
|     |        | X                       | Y          | Z          |
| 1   | C      | 2.3622670               | 1.8147910  | 0.3456670  |
| 2   | C      | 2.1747580               | 3.0781380  | -0.2172810 |
| 3   | C      | 0.9100970               | 3.4931570  | -0.6342980 |
| 4   | C      | -0.2388140              | 2.6459830  | -0.4940000 |
| 5   | C      | -0.0315410              | 1.3797030  | 0.0508840  |
| 6   | C      | 1.2635670               | 0.8976420  | 0.4524930  |
| 7   | C      | -1.5987080              | 3.0281700  | -0.8780480 |
| 8   | C      | -2.6350360              | 2.0175060  | -0.6375730 |
| 9   | C      | -2.3608780              | 0.7902340  | -0.1046350 |
| 10  | O      | -1.0389690              | 0.5091920  | 0.2256260  |
| 11  | C      | -3.2620940              | -0.3228260 | 0.1836520  |
| 12  | C      | -2.7525010              | -1.5914110 | 0.5399540  |
| 13  | C      | -3.5937010              | -2.6583700 | 0.8205460  |
| 14  | C      | -4.9836780              | -2.4869680 | 0.7552790  |
| 15  | C      | -5.5106870              | -1.2388230 | 0.4012600  |
| 16  | C      | -4.6636910              | -0.1721120 | 0.1188410  |
| 17  | O      | 3.5910230               | 1.5207470  | 0.7617810  |
| 18  | O      | 0.7106960               | 4.7008720  | -1.1648410 |
| 19  | O      | -3.8745440              | 2.4007820  | -1.0012060 |
| 20  | O      | -1.9485980              | 4.1029640  | -1.3807350 |
| 21  | O      | -5.7552660              | -3.5678610 | 1.0428120  |
| 22  | C      | 1.4408450               | -0.4171890 | 0.8974860  |
| 23  | H      | 3.0299440               | 3.7418360  | -0.2956180 |
| 24  | H      | -1.6813560              | -1.7485520 | 0.5845630  |
| 25  | H      | -3.1971610              | -3.6325680 | 1.0863090  |
| 26  | H      | -6.5870640              | -1.0964550 | 0.3468260  |
| 27  | H      | -5.0929790              | 0.7823050  | -0.1533790 |
| 28  | H      | 3.7032200               | 0.7197320  | 1.3644310  |
| 29  | H      | 1.5405880               | 5.1989460  | -1.2191120 |
| 30  | H      | -3.7592170              | 3.3089970  | -1.3606060 |
| 31  | H      | -6.6950060              | -3.3526460 | 0.9644050  |
| 32  | H      | 0.6134900               | -1.1072930 | 0.8920740  |
| 33  | H      | 2.4248400               | -0.8459000 | 0.9835170  |
| 34  | N      | 1.7341700               | -1.7987180 | -1.4433190 |
| 35  | C      | 2.0535270               | -3.2270800 | -1.2564950 |
| 36  | C      | 2.7421170               | -1.1311070 | -2.2902380 |
| 37  | C      | 3.0236360               | -1.9060320 | -3.5805450 |
| 38  | C      | 2.3628110               | -3.9354150 | -2.5801330 |
| 39  | O      | 3.3907400               | -3.2505920 | -3.2865030 |

|    |   |           |            |            |
|----|---|-----------|------------|------------|
| 40 | H | 0.8203870 | -1.7174440 | -1.8892230 |
| 41 | H | 1.2172230 | -3.7178260 | -0.7455340 |
| 42 | H | 2.9346730 | -3.2937190 | -0.6049660 |
| 43 | H | 3.6711680 | -1.0528950 | -1.7120330 |
| 44 | H | 2.4006110 | -0.1151150 | -2.5162430 |
| 45 | H | 3.8615560 | -1.4674340 | -4.1292180 |
| 46 | H | 2.1350620 | -1.8955510 | -4.2345150 |
| 47 | H | 2.7260060 | -4.9523800 | -2.4079080 |
| 48 | H | 1.4529910 | -3.9910680 | -3.2019920 |
| 49 | N | 1.3712030 | -0.3526350 | 3.1355180  |
| 50 | H | 0.4404980 | -0.7118430 | 3.3403270  |
| 51 | H | 1.3650540 | 0.6378770  | 3.3764310  |
| 52 | C | 2.3967490 | -1.0886850 | 3.9046900  |
| 53 | H | 2.0912020 | -1.2052170 | 4.9527580  |
| 54 | H | 2.4720170 | -2.0984770 | 3.4822010  |
| 55 | N | 4.3810570 | -0.3603070 | 2.5466890  |
| 56 | H | 5.2924070 | 0.0933020  | 2.6168920  |
| 57 | H | 4.5796470 | -1.3078030 | 2.2250190  |
| 58 | C | 3.7626160 | -0.4056100 | 3.8931130  |
| 59 | H | 4.4011950 | -0.9294510 | 4.6157580  |
| 60 | H | 3.6633680 | 0.6272410  | 4.2474050  |

SCF Done: E(RB3LYP) = -1545.86238760 A.U.

Zero-point correction= 0.493105 (Hartree/Particle)

Thermal correction to Energy= 0.523919

Thermal correction to Enthalpy= 0.524863

Thermal correction to Gibbs Free Energy= 0.425856

Sum of electronic and zero-point Energies= -1545.369283

Sum of electronic and thermal Energies= -1545.338468

Sum of electronic and thermal Enthalpies= -1545.337524

Sum of electronic and thermal Free Energies= -1545.436531

Low frequencies --- -149.3169 -6.7486 -4.5433 -0.0058 -0.0053 -0.0041

Low frequencies --- 4.9744 8.8495 11.3835

\*\*\*\*\* 1 imaginary frequencies (negative Signs) \*\*\*\*\*

**Table S2.** Standard Orientation of the Transition State [morpholine...kaempferol...1,2-diaminopropane]

| Tag | Symbol | Coordinates (Angstroms) |           |            |
|-----|--------|-------------------------|-----------|------------|
|     |        | X                       | Y         | Z          |
| 1   | C      | -2.2236780              | 1.7285780 | -0.0851180 |
| 2   | C      | -2.0212620              | 2.9908520 | 0.4774710  |
| 3   | C      | -0.7383790              | 3.4346540 | 0.7957260  |
| 4   | C      | 0.4171080               | 2.6198190 | 0.5520660  |
| 5   | C      | 0.1989450               | 1.3549130 | 0.0087340  |
| 6   | C      | -1.1120110              | 0.8438290 | -0.2948530 |



---

|    |   |            |            |            |
|----|---|------------|------------|------------|
| 7  | C | 1.7926680  | 3.0319990  | 0.8348030  |
| 8  | C | 2.8311910  | 2.0490080  | 0.5058630  |
| 9  | C | 2.5465210  | 0.8201930  | -0.0182720 |
| 10 | O | 1.2106630  | 0.5118380  | -0.2540280 |
| 11 | C | 3.4489980  | -0.2697800 | -0.3814850 |
| 12 | C | 2.9417890  | -1.5391490 | -0.7386770 |
| 13 | C | 3.7838260  | -2.5854470 | -1.0864710 |
| 14 | C | 5.1724400  | -2.3924950 | -1.0888680 |
| 15 | C | 5.6973410  | -1.1430880 | -0.7363470 |
| 16 | C | 4.8496190  | -0.0968290 | -0.3874390 |
| 17 | O | -3.4723170 | 1.4072430  | -0.4021740 |
| 18 | O | -0.5270940 | 4.6411550  | 1.3248610  |
| 19 | O | 4.0849930  | 2.4590590  | 0.7805610  |
| 20 | O | 2.1547300  | 4.1107720  | 1.3203960  |
| 21 | O | 5.9449740  | -3.4542430 | -1.4387530 |
| 22 | C | -1.2904630 | -0.4676280 | -0.7449000 |
| 23 | H | -2.8838080 | 3.6307000  | 0.6343120  |
| 24 | H | 1.8723960  | -1.7129430 | -0.7336220 |
| 25 | H | 3.3890990  | -3.5599440 | -1.3538670 |
| 26 | H | 6.7726920  | -0.9836000 | -0.7346520 |
| 27 | H | 5.2777200  | 0.8588040  | -0.1179700 |
| 28 | H | -3.6327270 | 0.6093510  | -1.0167420 |
| 29 | H | -1.3623790 | 5.1159570  | 1.4536470  |
| 30 | H | 3.9750930  | 3.3614730  | 1.1561380  |
| 31 | H | 6.8839750  | -3.2247190 | -1.4045990 |
| 32 | H | -0.4472670 | -1.1328100 | -0.8310750 |
| 33 | H | -2.2654830 | -0.9244430 | -0.7502100 |
| 34 | N | -1.3242620 | -1.8895280 | 1.5952800  |
| 35 | C | -1.8104210 | -3.2737610 | 1.4422280  |
| 36 | C | -2.1232450 | -1.1491310 | 2.5909370  |
| 37 | C | -2.2880510 | -1.9263750 | 3.9002280  |
| 38 | C | -1.9871220 | -3.9837710 | 2.7890450  |
| 39 | O | -2.8252990 | -3.2219660 | 3.6504490  |
| 40 | H | -0.3510840 | -1.9105650 | 1.9000850  |
| 41 | H | -1.1145670 | -3.8301180 | 0.8038310  |
| 42 | H | -2.7821580 | -3.2359270 | 0.9326230  |
| 43 | H | -3.1140170 | -0.9630680 | 2.1583040  |
| 44 | H | -1.6506450 | -0.1784850 | 2.7763560  |
| 45 | H | -2.9889360 | -1.4233150 | 4.5719800  |
| 46 | H | -1.3165530 | -2.0175910 | 4.4151270  |
| 47 | H | -2.4708610 | -4.9562720 | 2.6622990  |
| 48 | H | -1.0045880 | -4.1428460 | 3.2653920  |
| 49 | N | -1.4409660 | -0.3569800 | -2.9837880 |
| 50 | H | -0.5368450 | -0.7098500 | -3.2924920 |

---

|    |   |            |            |            |
|----|---|------------|------------|------------|
| 51 | H | -1.4572400 | 0.6398350  | -3.1964080 |
| 52 | C | -2.5405480 | -1.0715450 | -3.6658550 |
| 53 | H | -2.3470330 | -1.1478050 | -4.7438580 |
| 54 | H | -2.5663940 | -2.0971240 | -3.2768600 |
| 55 | N | -4.4095710 | -0.4298090 | -2.1003170 |
| 56 | H | -4.4254190 | -1.4008340 | -1.7875990 |
| 57 | C | -3.9010590 | -0.4009770 | -3.4876130 |
| 58 | H | -4.6076210 | -0.8942640 | -4.1716900 |
| 59 | H | -3.8458000 | 0.6493690  | -3.8014170 |
| 60 | C | -5.7955420 | 0.0899310  | -2.0139100 |
| 61 | H | -6.4810180 | -0.4414120 | -2.6865290 |
| 62 | H | -6.1540750 | -0.0080300 | -0.9871690 |
| 63 | H | -5.7980410 | 1.1510350  | -2.2758050 |

SCF Done: E(RB3LYP) = -1585.17154050 A.U.

Zero-point correction= 0.520591 (Hartree/Particle) 0.02748485

Thermal correction to Energy= 0.552883

Thermal correction to Enthalpy= 0.553827

Thermal correction to Gibbs Free Energy= 0.451491

Sum of electronic and zero-point Energies= -1584.650950

Sum of electronic and thermal Energies= -1584.618658

Sum of electronic and thermal Enthalpies= -1584.617714

Sum of electronic and thermal Free Energies= -1584.720050

Low frequencies --- -147.5241 -6.9518 -7.3167 -0.0097 -0.0101 -1.7354

Low frequencies --- 0.0026 10.7349 14.6511

\*\*\*\*\* 1 imaginary frequencies (negative Signs) \*\*\*\*\*

**Table S3.** Standard Orientation of the Transition State [morpholine...kaempferol...isopropanolamine]

| Tag | Symbol | Coordinates (Angstroms) |            |            |
|-----|--------|-------------------------|------------|------------|
|     |        | X                       | Y          | Z          |
| 1   | C      | -2.0873890              | 1.9829920  | -0.3073500 |
| 2   | C      | -1.7506060              | 3.3072630  | -0.0320140 |
| 3   | C      | -0.4174460              | 3.6787280  | 0.1465640  |
| 4   | C      | 0.6420060               | 2.7198230  | 0.0442320  |
| 5   | C      | 0.2821380               | 1.3977450  | -0.2204370 |
| 6   | C      | -1.0808610              | 0.9683040  | -0.3693160 |
| 7   | C      | 2.0621290               | 3.0401250  | 0.1986310  |
| 8   | C      | 2.9889480               | 1.9124400  | 0.0512970  |
| 9   | C      | 2.5683390               | 0.6385790  | -0.2056590 |
| 10  | O      | 1.1999690               | 0.4230880  | -0.3352500 |
| 11  | C      | 3.3490390               | -0.5852580 | -0.3704490 |
| 12  | C      | 2.7102580               | -1.8407470 | -0.4803430 |
| 13  | C      | 3.4353040               | -3.0127670 | -0.6395610 |
| 14  | C      | 4.8353700               | -2.9653470 | -0.6947960 |

---

|    |   |            |            |            |
|----|---|------------|------------|------------|
| 15 | C | 5.4898280  | -1.7321990 | -0.5863540 |
| 16 | C | 4.7591730  | -0.5593800 | -0.4262050 |
| 17 | O | -3.3854900 | 1.7303890  | -0.5117930 |
| 18 | O | -0.0724610 | 4.9420720  | 0.4042070  |
| 19 | O | 4.2866490  | 2.2426590  | 0.2026600  |
| 20 | O | 2.5441110  | 4.1532150  | 0.4418430  |
| 21 | O | 5.4894720  | -4.1459570 | -0.8516930 |
| 22 | C | -1.4007170 | -0.3910780 | -0.5372620 |
| 23 | H | -2.5442650 | 4.0461170  | 0.0141370  |
| 24 | H | 1.6296900  | -1.9015300 | -0.4321280 |
| 25 | H | 2.9393770  | -3.9744360 | -0.7181920 |
| 26 | H | 6.5751220  | -1.6847570 | -0.6274770 |
| 27 | H | 5.2866850  | 0.3808010  | -0.3436970 |
| 28 | H | -3.5915130 | 0.8354970  | -0.8694470 |
| 29 | H | -0.8539360 | 5.5133360  | 0.4542120  |
| 30 | H | 4.2778980  | 3.2086760  | 0.3873970  |
| 31 | H | 6.4471040  | -4.0110810 | -0.8704580 |
| 32 | H | -0.6162110 | -1.1293810 | -0.5179610 |
| 33 | H | -2.4054790 | -0.7578140 | -0.4065530 |
| 34 | N | -1.4151850 | -1.2525590 | 2.0043780  |
| 35 | C | -2.0526710 | -2.5772780 | 2.1316750  |
| 36 | C | -2.0787100 | -0.2557120 | 2.8665720  |
| 37 | C | -2.2451310 | -0.7534670 | 4.3056200  |
| 38 | C | -2.2226210 | -3.0016610 | 3.5945160  |
| 39 | O | -2.9250540 | -2.0047260 | 4.3278640  |
| 40 | H | -0.4346050 | -1.3265070 | 2.2760110  |
| 41 | H | -1.4556450 | -3.3165520 | 1.5853890  |
| 42 | H | -3.0412160 | -2.5224590 | 1.6584080  |
| 43 | H | -3.0689760 | -0.0490100 | 2.4427450  |
| 44 | H | -1.5017290 | 0.6751890  | 2.8447860  |
| 45 | H | -2.8505920 | -0.0597290 | 4.8952380  |
| 46 | H | -1.2592300 | -0.8544470 | 4.7906100  |
| 47 | H | -2.8114370 | -3.9197380 | 3.6728970  |
| 48 | H | -1.2356430 | -3.1802300 | 4.0543150  |
| 49 | N | -1.6662640 | -0.7032810 | -2.7082030 |
| 50 | H | -0.7669540 | -1.0910900 | -2.9875970 |
| 51 | H | -1.7334380 | 0.2202460  | -3.1356580 |
| 52 | C | -4.1432290 | -0.9267840 | -3.0076960 |
| 53 | H | -4.1494720 | 0.0124340  | -3.5813720 |
| 54 | C | -2.7721490 | -1.5858330 | -3.1385270 |
| 55 | H | -2.6432820 | -1.8898120 | -4.1853540 |
| 56 | H | -2.7425050 | -2.4907720 | -2.5220460 |
| 57 | O | -4.3438610 | -0.5951600 | -1.6076810 |
| 58 | H | -5.2937590 | -0.5253360 | -1.4335680 |

---

|    |   |            |            |            |
|----|---|------------|------------|------------|
| 59 | C | -5.2556340 | -1.8390530 | -3.5128830 |
| 60 | H | -6.2321850 | -1.3551190 | -3.4038280 |
| 61 | H | -5.1223230 | -2.0587280 | -4.5762370 |
| 62 | H | -5.2702390 | -2.7841460 | -2.9605820 |

SCF Done: E(RB3LYP) = -1605.04606746 A.U.

Zero-point correction= 0.507945 (Hartree/Particle)

Thermal correction to Energy= 0.540232

Thermal correction to Enthalpy= 0.541177

Thermal correction to Gibbs Free Energy= 0.439321

Sum of electronic and zero-point Energies= -1604.538123

Sum of electronic and thermal Energies= -1604.505835

Sum of electronic and thermal Enthalpies= -1604.504891

Sum of electronic and thermal Free Energies= -1604.606747

Low frequencies --- -172.3236 -5.8643 -4.8261 -3.0118 -0.0039 -0.0028

Low frequencies --- -0.0010 11.1408 15.7411

\*\*\*\*\* 1 imaginary frequencies (negative Signs) \*\*\*\*\*

**Table S4.** Standard Orientation of the Transition State [morpholine...kaempferol...ethanolamine]

| Tag | Symbol | Coordinates (Angstroms) |            |            |
|-----|--------|-------------------------|------------|------------|
|     |        | X                       | Y          | Z          |
| 1   | C      | 2.3205050               | 1.8471700  | 0.4562250  |
| 2   | C      | 2.1227700               | 3.1312300  | -0.0481810 |
| 3   | C      | 0.8570480               | 3.5425840  | -0.4684260 |
| 4   | C      | -0.2747930              | 2.6683850  | -0.3853410 |
| 5   | C      | -0.0516180              | 1.3823810  | 0.1080840  |
| 6   | C      | 1.2436660               | 0.9066890  | 0.5096870  |
| 7   | C      | -1.6357830              | 3.0412820  | -0.7761400 |
| 8   | C      | -2.6570500              | 2.0039500  | -0.5935920 |
| 9   | C      | -2.3687630              | 0.7610870  | -0.1065570 |
| 10  | O      | -1.0465820              | 0.4878710  | 0.2301570  |
| 11  | C      | -3.2552360              | -0.3765180 | 0.1256790  |
| 12  | C      | -2.7296900              | -1.6532670 | 0.4249980  |
| 13  | C      | -3.5573620              | -2.7428850 | 0.6541920  |
| 14  | C      | -4.9493680              | -2.5867460 | 0.5929400  |
| 15  | C      | -5.4920290              | -1.3308150 | 0.2942820  |
| 16  | C      | -4.6585300              | -0.2414180 | 0.0631870  |
| 17  | O      | 3.5574460               | 1.5606000  | 0.8800990  |
| 18  | O      | 0.6447110               | 4.7696110  | -0.9478840 |
| 19  | O      | -3.8980860              | 2.3799280  | -0.9600430 |
| 20  | O      | -1.9965550              | 4.1295160  | -1.2403840 |
| 21  | O      | -5.7072310              | -3.6894760 | 0.8288460  |
| 22  | C      | 1.4343880               | -0.4289080 | 0.9079050  |
| 23  | H      | 2.9676610               | 3.8116330  | -0.0822710 |

|    |   |            |            |            |
|----|---|------------|------------|------------|
| 24 | H | -1.6566000 | -1.7986750 | 0.4639140  |
| 25 | H | -3.1485910 | -3.7231520 | 0.8753380  |
| 26 | H | -6.5700670 | -1.2002750 | 0.2430450  |
| 27 | H | -5.0997590 | 0.7187050  | -0.1667330 |
| 28 | H | 3.6466070  | 0.7196450  | 1.3834730  |
| 29 | H | 1.4659710  | 5.2842790  | -0.9651460 |
| 30 | H | -3.7944820 | 3.3035760  | -1.2813770 |
| 31 | H | -6.6495630 | -3.4837700 | 0.7557820  |
| 32 | H | 0.6136060  | -1.1242250 | 0.8456240  |
| 33 | H | 2.4187230  | -0.8609200 | 0.9863710  |
| 34 | N | 1.8034460  | -1.6628450 | -1.4701050 |
| 35 | C | 2.1618650  | -3.0864570 | -1.3192720 |
| 36 | C | 2.8211140  | -0.9363470 | -2.2540740 |
| 37 | C | 3.1685230  | -1.6549170 | -3.5611650 |
| 38 | C | 2.5359050  | -3.7377620 | -2.6554380 |
| 39 | O | 3.5646410  | -2.9984240 | -3.3035680 |
| 40 | H | 0.9044930  | -1.5933380 | -1.9472390 |
| 41 | H | 1.3244310  | -3.6199000 | -0.8549770 |
| 42 | H | 3.0214570  | -3.1473070 | -0.6396870 |
| 43 | H | 3.7267010  | -0.8570780 | -1.6400620 |
| 44 | H | 2.4597170  | 0.0780980  | -2.4549560 |
| 45 | H | 4.0112160  | -1.1730850 | -4.0644450 |
| 46 | H | 2.3021990  | -1.6443260 | -4.2444110 |
| 47 | H | 2.9248960  | -4.7486860 | -2.5057330 |
| 48 | H | 1.6489910  | -3.7989690 | -3.3091110 |
| 49 | N | 1.3089470  | -0.4581960 | 3.1019640  |
| 50 | H | 0.3610690  | -0.7914130 | 3.2691220  |
| 51 | H | 1.3397210  | 0.5127610  | 3.4127220  |
| 52 | C | 3.6903230  | -0.6945070 | 3.8113830  |
| 53 | H | 4.3469960  | -1.3386780 | 4.4043760  |
| 54 | H | 3.6904500  | 0.3062790  | 4.2648700  |
| 55 | C | 2.2937970  | -1.2946550 | 3.8209870  |
| 56 | H | 2.0001860  | -1.4370170 | 4.8698060  |
| 57 | H | 2.3120440  | -2.2798580 | 3.3439980  |
| 58 | O | 4.1792110  | -0.6118100 | 2.4559960  |
| 59 | H | 5.1466340  | -0.6068830 | 2.4607680  |

SCF Done: E(RB3LYP) = -1565.72239921 A.U.

Zero-point correction= 0.480450 (Hartree/Particle)

Thermal correction to Energy= 0.511256

Thermal correction to Enthalpy= 0.512200

Thermal correction to Gibbs Free Energy= 0.413683

Sum of electronic and zero-point Energies= -1565.241949

Sum of electronic and thermal Energies= -1565.211143

Sum of electronic and thermal Enthalpies= -1565.210199

Sum of electronic and thermal Free Energies= -1565.308716  
 Low frequencies --- -174.0901 -5.5002 -2.9480 -0.0002 0.0004 0.0011  
 Low frequencies --- 4.5184 9.6168 12.6566  
 \*\*\*\*\* 1 imaginary frequencies (negative Signs) \*\*\*\*\*

**Table S5.** Standard Orientation of the Transition State [morpholine···kaempferol···thiosemicarbazide]

| Tag | Symbol | Coordinates (Angstroms) |            |            |
|-----|--------|-------------------------|------------|------------|
|     |        | X                       | Y          | Z          |
| 1   | C      | -1.8559970              | 2.2351520  | -0.2144850 |
| 2   | C      | -1.4372060              | 3.5237610  | 0.1034590  |
| 3   | C      | -0.0845170              | 3.8011760  | 0.3152710  |
| 4   | C      | 0.9116440               | 2.7780710  | 0.1990560  |
| 5   | C      | 0.4692230               | 1.4894810  | -0.0995860 |
| 6   | C      | -0.9178130              | 1.1539640  | -0.2731050 |
| 7   | C      | 2.3494070               | 3.0035090  | 0.3666320  |
| 8   | C      | 3.2022070               | 1.8224910  | 0.1901980  |
| 9   | C      | 2.7007430               | 0.5857370  | -0.0979370 |
| 10  | O      | 1.3216400               | 0.4599680  | -0.2384890 |
| 11  | C      | 3.4036930               | -0.6807040 | -0.2874120 |
| 12  | C      | 2.6984910               | -1.9045590 | -0.2890780 |
| 13  | C      | 3.3500720               | -3.1158840 | -0.4716400 |
| 14  | C      | 4.7391770               | -3.1394280 | -0.6619210 |
| 15  | C      | 5.4584000               | -1.9377920 | -0.6596980 |
| 16  | C      | 4.8014190               | -0.7257530 | -0.4742780 |
| 17  | O      | -3.1720020              | 2.0645780  | -0.4077280 |
| 18  | O      | 0.3377550               | 5.0304640  | 0.6109350  |
| 19  | O      | 4.5180920               | 2.0594620  | 0.3534900  |
| 20  | O      | 2.8988170               | 4.0755180  | 0.6447400  |
| 21  | O      | 5.3188700               | -4.3555490 | -0.8372080 |
| 22  | C      | -1.3240050              | -0.1858440 | -0.4095800 |
| 23  | H      | -2.1808380              | 4.3126130  | 0.1543520  |
| 24  | H      | 1.6272070               | -1.9084880 | -0.1245720 |
| 25  | H      | 2.8070990               | -4.0550640 | -0.4591860 |
| 26  | H      | 6.5357660               | -1.9460450 | -0.8043130 |
| 27  | H      | 5.3767070               | 0.1901540  | -0.4741860 |
| 28  | H      | -3.3977240              | 1.3159230  | -1.0019320 |
| 29  | H      | -0.4039580              | 5.6528050  | 0.6613330  |
| 30  | H      | 4.5763680               | 3.0167080  | 0.5701390  |
| 31  | H      | 6.2765340               | -4.2709100 | -0.9439980 |
| 32  | H      | -0.6117400              | -0.9772680 | -0.2388730 |
| 33  | H      | -2.3650730              | -0.4575050 | -0.3131900 |
| 34  | N      | -1.7719520              | -0.9407660 | 2.2473540  |
| 35  | C      | -1.4286640              | -2.3360450 | 2.5842900  |

|    |   |            |            |            |
|----|---|------------|------------|------------|
| 36 | C | -3.1738540 | -0.6377090 | 2.6008260  |
| 37 | C | -3.5245370 | -1.0668650 | 4.0281220  |
| 38 | C | -1.8359310 | -2.7120870 | 4.0124000  |
| 39 | O | -3.2170020 | -2.4430770 | 4.2291760  |
| 40 | H | -1.1561350 | -0.3127490 | 2.7635910  |
| 41 | H | -0.3517540 | -2.4835580 | 2.4435590  |
| 42 | H | -1.9568580 | -2.9920190 | 1.8799510  |
| 43 | H | -3.8226270 | -1.1785360 | 1.8996330  |
| 44 | H | -3.3528610 | 0.4345030  | 2.4659220  |
| 45 | H | -4.5947890 | -0.9554720 | 4.2222890  |
| 46 | H | -2.9720080 | -0.4503590 | 4.7576870  |
| 47 | H | -1.6938990 | -3.7807720 | 4.1955150  |
| 48 | H | -1.2260820 | -2.1499310 | 4.7401700  |
| 49 | N | -1.4059040 | -0.6263970 | -2.4929380 |
| 50 | N | -2.2788400 | -1.6616760 | -2.8986350 |
| 51 | C | -3.6237150 | -1.3825040 | -2.9945620 |
| 52 | S | -4.2273450 | 0.1889780  | -2.8970470 |
| 53 | H | -0.4910300 | -0.7854370 | -2.9199020 |
| 54 | H | -1.8100390 | 0.2380060  | -2.8768900 |
| 55 | H | -1.9916440 | -2.5773560 | -2.5702500 |
| 56 | N | -4.4099560 | -2.4572980 | -3.2060530 |
| 57 | H | -4.0392910 | -3.3483140 | -3.5112180 |
| 58 | H | -5.3960340 | -2.2915270 | -3.3521110 |

SCF Done: E(RB3LYP) = -1958.85975720 A.U.

Zero-point correction= 0.458858 (Hartree/Particle)

Thermal correction to Energy= 0.490866

Thermal correction to Enthalpy= 0.491810

Thermal correction to Gibbs Free Energy= 0.390545

Sum of electronic and zero-point Energies= -1958.400899

Sum of electronic and thermal Energies= -1958.368891

Sum of electronic and thermal Enthalpies= -1958.367947

Sum of electronic and thermal Free Energies= -1958.469212

Low frequencies --- -195.0181 -3.7581 -0.0001 0.0012 0.0016 1.8145

Low frequencies --- 5.0212 14.0442 17.3504

\*\*\*\*\* 1 imaginary frequencies (negative Signs) \*\*\*\*\*

**Table S6.** Standard Orientation of the Transition State [morpholine...kaempferol...4-methylthiosemicarbazide]

| Tag | Symbol | Coordinates (Angstroms) |           |            |
|-----|--------|-------------------------|-----------|------------|
|     |        | X                       | Y         | Z          |
| 1   | C      | -1.3980290              | 2.4846140 | -0.5095000 |
| 2   | C      | -0.8069490              | 3.7437800 | -0.4618050 |
| 3   | C      | 0.5786220               | 3.8767290 | -0.3435060 |
| 4   | C      | 1.4344620               | 2.7288780 | -0.2824630 |

---

|    |   |            |            |            |
|----|---|------------|------------|------------|
| 5  | C | 0.8224350  | 1.4761500  | -0.3090510 |
| 6  | C | -0.6035890 | 1.2980460  | -0.3730900 |
| 7  | C | 2.8957910  | 2.7929440  | -0.2038280 |
| 8  | C | 3.5871260  | 1.4990680  | -0.1771260 |
| 9  | C | 2.9232480  | 0.3065100  | -0.2058510 |
| 10 | O | 1.5334270  | 0.3372090  | -0.2687420 |
| 11 | C | 3.4560980  | -1.0534450 | -0.1800610 |
| 12 | C | 2.6126960  | -2.1541270 | 0.0879180  |
| 13 | C | 3.1008460  | -3.4528980 | 0.1055240  |
| 14 | C | 4.4588940  | -3.6915290 | -0.1492530 |
| 15 | C | 5.3136960  | -2.6138880 | -0.4121910 |
| 16 | C | 4.8206610  | -1.3131590 | -0.4261090 |
| 17 | O | -2.7312100 | 2.4514890  | -0.6321310 |
| 18 | O | 1.1640410  | 5.0735700  | -0.3073740 |
| 19 | O | 4.9293790  | 1.5884350  | -0.1073090 |
| 20 | O | 3.5864040  | 3.8172450  | -0.1541200 |
| 21 | O | 4.8756020  | -4.9845680 | -0.1213550 |
| 22 | C | -1.1799430 | 0.0280510  | -0.2177410 |
| 23 | H | -1.4434390 | 4.6183650  | -0.5503960 |
| 24 | H | 1.5639530  | -1.9874430 | 0.3049330  |
| 25 | H | 2.4531230  | -4.2951420 | 0.3248980  |
| 26 | H | 6.3684310  | -2.7889300 | -0.6086740 |
| 27 | H | 5.4985320  | -0.4953000 | -0.6300150 |
| 28 | H | -3.0771230 | 1.6521910  | -1.0933540 |
| 29 | H | 0.5082640  | 5.7856210  | -0.3620730 |
| 30 | H | 5.1160270  | 2.5533440  | -0.0799490 |
| 31 | H | 5.8256290  | -5.0461180 | -0.2926060 |
| 32 | H | -0.5656340 | -0.8039880 | 0.0875220  |
| 33 | H | -2.2415830 | -0.0753580 | -0.0489590 |
| 34 | N | -1.6572810 | -0.1296810 | 2.5534720  |
| 35 | C | -1.5234340 | -1.4721930 | 3.1501830  |
| 36 | C | -2.9974750 | 0.4360490  | 2.8072260  |
| 37 | C | -3.4102080 | 0.3329950  | 4.2778690  |
| 38 | C | -1.9851320 | -1.5152340 | 4.6105650  |
| 39 | O | -3.3119080 | -1.0133680 | 4.7332980  |
| 40 | H | -0.9530370 | 0.4871060  | 2.9577400  |
| 41 | H | -0.4798460 | -1.7971020 | 3.0693310  |
| 42 | H | -2.1412300 | -2.1645950 | 2.5630200  |
| 43 | H | -3.7200750 | -0.1232430 | 2.1985110  |
| 44 | H | -3.0142680 | 1.4790910  | 2.4734030  |
| 45 | H | -4.4520660 | 0.6338030  | 4.4181930  |
| 46 | H | -2.7727170 | 0.9847490  | 4.8994610  |
| 47 | H | -2.0032590 | -2.5407510 | 4.9899100  |
| 48 | H | -1.3008120 | -0.9226370 | 5.2414300  |

---



|    |   |            |            |            |
|----|---|------------|------------|------------|
| 49 | N | -1.4428740 | -0.8349840 | -2.1799680 |
| 50 | N | -2.4992860 | -1.7618460 | -2.3311110 |
| 51 | C | -3.7802850 | -1.2752620 | -2.4581080 |
| 52 | S | -4.0861770 | 0.3728870  | -2.7217250 |
| 53 | H | -0.5976380 | -1.2352890 | -2.5917320 |
| 54 | H | -1.7271200 | -0.0103390 | -2.7261940 |
| 55 | H | -2.3441970 | -2.6328060 | -1.8365970 |
| 56 | N | -4.7598210 | -2.1933500 | -2.4196500 |
| 57 | H | -5.6909180 | -1.8184360 | -2.5428250 |
| 58 | C | -4.5862540 | -3.6420180 | -2.3492290 |
| 59 | H | -4.1798260 | -3.9547590 | -1.3790450 |
| 60 | H | -5.5643780 | -4.1085520 | -2.4629610 |
| 61 | H | -3.9366600 | -4.0011190 | -3.1549600 |

SCF Done: E(RB3LYP) = -1998.17295221 A.U.

Zero-point correction= 0.486345 (Hartree/Particle)

Thermal correction to Energy= 0.519834

Thermal correction to Enthalpy= 0.520779

Thermal correction to Gibbs Free Energy= 0.416175

Sum of electronic and zero-point Energies= -1997.686607

Sum of electronic and thermal Energies= -1997.653118

Sum of electronic and thermal Enthalpies= -1997.652173

Sum of electronic and thermal Free Energies= -1997.756777

Low frequencies --- -192.1683 -4.5317 -1.0679 0.0103 0.0085 2.0644

Low frequencies --- 0.0138 15.7122 18.0526

\*\*\*\*\* 1 imaginary frequencies (negative Signs) \*\*\*\*\*

### Determination of stoichiometry of complex and the stability constant of complex

According to the Beer-Lambert law, the stoichiometry of complex is measured by Job's method for concentration continuous variation<sup>[1]</sup>. Equimolar solutions of metal ion and ligand ( $50 \mu\text{mol}\cdot\text{L}^{-1}$  for each) are prepared. For example, 10.00, 9.00, 8.00, 7.00, 6.00, 5.00, 4.00, 3.00, 2.00, 1.00 and 0.00 mL ligand solutions ( $50 \mu\text{m/L}$  in EtOH) were placed in 11 small beakers, respectively. Then, 0.00, 1.00, 2.00, 3.00, 4.00, 5.00, 6.00, 7.00, 8.00, 9.00 and 10.00 mL solutions of metal ion ( $50 \mu\text{m/L}$  in EtOH) were added in turn. The plot of absorbance (with  $\lambda_{\text{max}}$ ) versus mole fraction ( $x_L$ ) of ligand ( $L/(M+L)$ ) indicates that the stoichiometry of complex is 1:1 (metal:ligand).

Then, the stability constant ( $k$ ) can be calculated by the following equation:

$$k = (1-\alpha)/c\alpha^2$$

Where,  $c$  is the initial concentration (here,  $c = 2.5 \times 10^{-5} \text{ mol/L}$ ) and  $\alpha$  is the dissociation degree of the complex.

$\alpha$  can be calculated by the following equation:

$$\alpha = (A_0 - A)/A_0$$

Where,  $A$  is the absorbance value of maximum absorbance found from the abovementioned  $A-x_L$  graph,  $A_0$  is the absorbance at the stoichiometric molar- ratio of the ligand and the metal in complex. For example, values of  $\alpha$  for some ligands with Lu are 0.1698(5a), 0.1463(5b), 0.1389(5c), 0.1026(5d), and 0.1667(5g). Thus, the corresponding stability constant values are  $1.15 \times 10^6$ ,  $1.59 \times 10^6$ ,  $1.78 \times 10^6$ ,  $3.41 \times 10^6$  and  $1.12 \times 10^6$ .

### Notes and references

- 1 U. B. Barache, A. B. Shaikh, T. N. Lokhande, G. S. Kamble, M. A. Anuse, S. H. Gaikwad, *Spectrochim. Acta A*, 2018, **189**, 443–453.
